# Supplementary material for: Comparative genomic analysis of primary tumors and metastases in breast cancer
Source: PubMed Central journal article supplement (PMC5053643; doi:10.18632/oncotarget.8349), 2016-03-25
Supplement: oncotarget-07-27208-s001.pdf [file oncotarget-07-27208-s001.pdf]

# Comparative genomic analysis of primary tumors and metastases in breast cancer

## Supplementary Materials

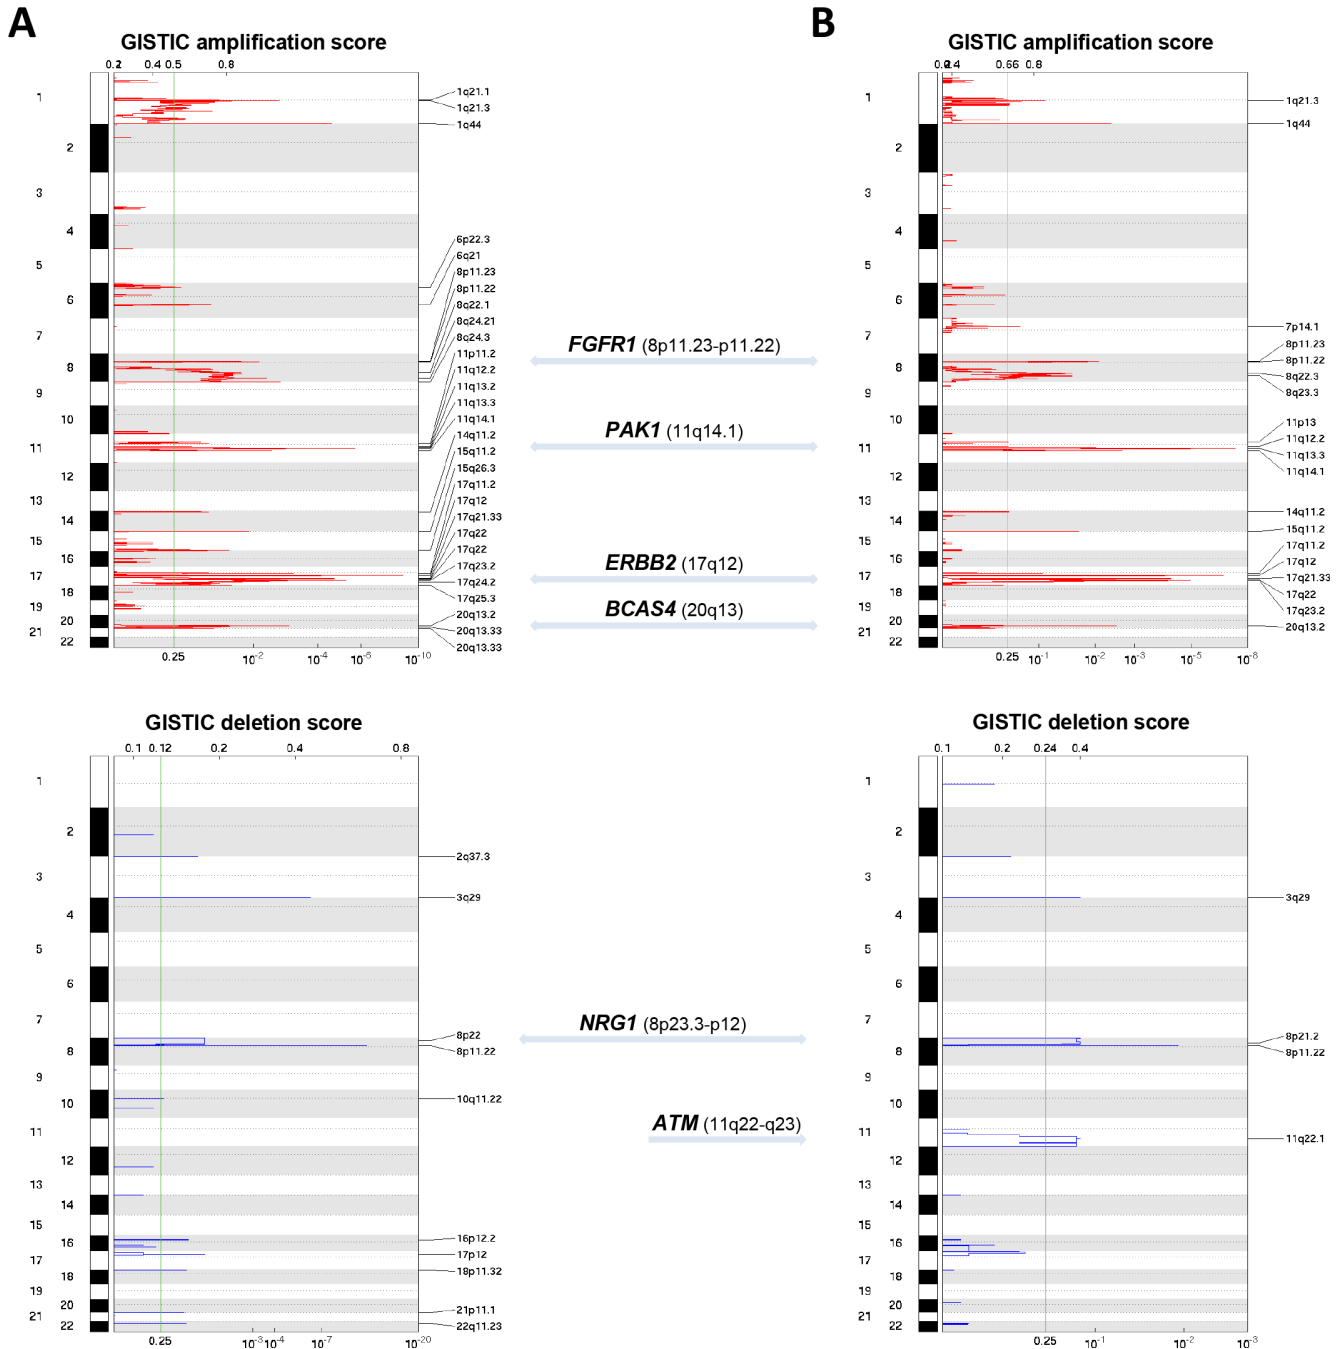

**Supplementary Figure S1: GISTIC analysis of copy number profiles.** The copy number profiles of primary tumors (A) and metastases (B) are shown. The x-axis represents the q-value (the vertical green line indicates the cut-off q-value of 0.25 for defining significant events) and the y-axis the chromosomal location. The GISTIC amplification (red peaks) or deletion (blue peaks) scores are shown at the top of each panel.

## Metastases

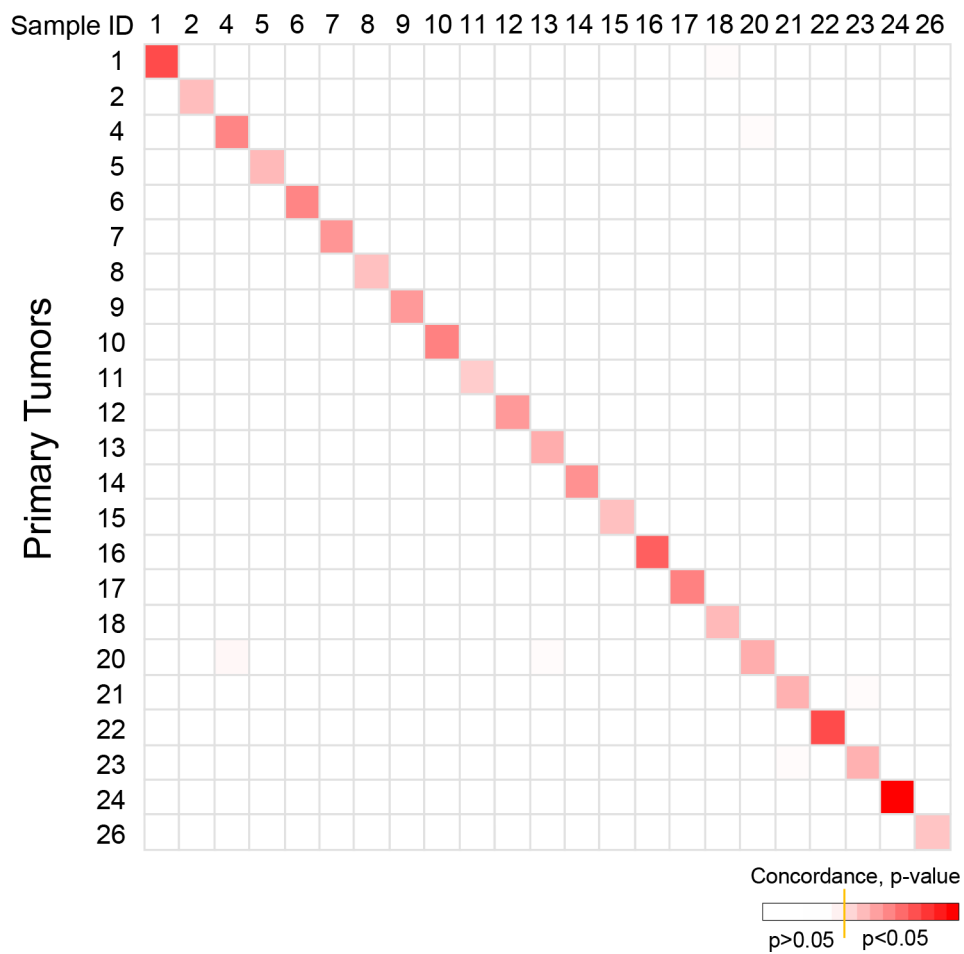

**Supplementary Figure S2: Concordance analysis based on mutational profiles.** Concordance matrix based on the  $-\log_{10}$   $p$ -values of the Fisher's exact test of a 2-by-2 contingency table representing the number of variants that are unshared or shared between each metastasis and each primary tumor. The test determines whether two samples share a significant number of variants. The  $p$ -value is color-coded according to the scale shown below the matrix.

**Supplementary Table S1: Count of copy number alterations (CNA) in all samples**

| Sample ID | Type          | Gain  | Loss | Amplification | Deletion | Total CNA number | Total CNA Percent* |
|-----------|---------------|-------|------|---------------|----------|------------------|--------------------|
| 1         | Primary Tumor | 1539  | 14   | 588           | 0        | 2141             | 1.33%              |
|           | Metastasis    | 7579  | 279  | 1531          | 0        | 9389             | 5.83%              |
| 2         | Primary Tumor | 9176  | 91   | 519           | 0        | 9786             | 6.08%              |
|           | Metastasis    | 21537 | 20   | 9966          | 168      | 31691            | 19.68%             |
| 4         | Primary Tumor | 841   | 21   | 623           | 0        | 1485             | 0.92%              |
|           | Metastasis    | 7377  | 21   | 844           | 0        | 8242             | 5.12%              |
| 5         | Primary Tumor | 18262 | 546  | 33            | 0        | 18841            | 11.70%             |
|           | Metastasis    | 10816 | 19   | 8             | 0        | 10843            | 6.73%              |
| 6         | Primary Tumor | 6593  | 43   | 1514          | 12       | 8162             | 5.07%              |
|           | Metastasis    | 7309  | 148  | 1763          | 12       | 9232             | 5.73%              |
| 7         | Primary Tumor | 25029 | 81   | 7438          | 0        | 32548            | 20.21%             |
|           | Metastasis    | 68    | 0    | 22            | 0        | 90               | 0.06%              |
| 8         | Primary Tumor | 5116  | 0    | 112           | 0        | 5228             | 3.25%              |
|           | Metastasis    | 9252  | 0    | 832           | 0        | 10084            | 6.26%              |
| 9         | Primary Tumor | 7813  | 68   | 456           | 12       | 8349             | 5.18%              |
|           | Metastasis    | 20096 | 56   | 1610          | 12       | 21774            | 13.52%             |
| 10        | Primary Tumor | 11063 | 6    | 707           | 0        | 11776            | 7.31%              |
|           | Metastasis    | 841   | 711  | 11314         | 0        | 12866            | 7.99%              |
| 11        | Primary Tumor | 1381  | 0    | 294           | 0        | 1675             | 1.04%              |
|           | Metastasis    | 317   | 15   | 70            | 0        | 402              | 0.25%              |
| 12        | Primary Tumor | 8730  | 15   | 666           | 0        | 9411             | 5.84%              |
|           | Metastasis    | 16682 | 3396 | 964           | 7        | 21049            | 13.07%             |
| 13        | Primary Tumor | 18166 | 235  | 1919          | 12       | 20332            | 12.62%             |
|           | Metastasis    | 26948 | 6969 | 4029          | 191      | 38137            | 23.68%             |
| 14        | Primary Tumor | 22971 | 71   | 8067          | 0        | 31109            | 19.31%             |
|           | Metastasis    | 32745 | 27   | 2139          | 0        | 34911            | 21.67%             |
| 15        | Primary Tumor | 5531  | 24   | 729           | 6        | 6290             | 3.91%              |
|           | Metastasis    | 8839  | 14   | 931           | 0        | 9784             | 6.07%              |
| 16        | Primary Tumor | 6569  | 30   | 1029          | 0        | 7628             | 4.74%              |
|           | Metastasis    | 7436  | 127  | 1359          | 0        | 8922             | 5.54%              |
| 17        | Primary Tumor | 4298  | 20   | 14            | 11       | 4343             | 2.70%              |
|           | Metastasis    | 4218  | 11   | 8             | 12       | 4249             | 2.64%              |
| 18        | Primary Tumor | 7719  | 28   | 1072          | 0        | 8819             | 5.48%              |
|           | Metastasis    | 4446  | 20   | 734           | 0        | 5200             | 3.23%              |
| 20        | Primary Tumor | 12740 | 0    | 6763          | 7        | 19510            | 12.11%             |
|           | Metastasis    | 20938 | 7    | 3848          | 7        | 24800            | 15.40%             |
| 21        | Primary Tumor | 15506 | 72   | 325           | 0        | 15903            | 9.87%              |
|           | Metastasis    | 292   | 0    | 70            | 0        | 362              | 0.22%              |

|    |               |       |      |      |    |       |        |
|----|---------------|-------|------|------|----|-------|--------|
| 22 | Primary Tumor | 4415  | 0    | 2540 | 0  | 6955  | 4.32%  |
|    | Metastasis    | 3947  | 0    | 2868 | 0  | 6815  | 4.23%  |
| 23 | Primary Tumor | 45558 | 6    | 8769 | 11 | 54344 | 33.74% |
|    | Metastasis    | 366   | 0    | 8    | 0  | 374   | 0.23%  |
| 24 | Primary Tumor | 7671  | 24   | 57   | 6  | 7758  | 4.82%  |
|    | Metastasis    | 11952 | 2206 | 65   | 6  | 14229 | 8.83%  |
| 26 | Primary Tumor | 5994  | 0    | 348  | 0  | 6342  | 3.94%  |
|    | Metastasis    | 94    | 0    | 113  | 0  | 207   | 0.13%  |

\*the percentage of probes displaying a CNA per sample was calculated as the total number of probes with CNAs divided by the total number of probes.

**Supplementary Table S2: Details of all detected mutations in all samples**

| Sample ID | Type          | Gene           | Variant Allele Frequency | Mutation_cDNA  | Mutation_Protein | Class                  | Recurrent |
|-----------|---------------|----------------|--------------------------|----------------|------------------|------------------------|-----------|
| 1         | Primary Tumor | ARID1A         | 54%                      | c.C1258T       | p.Q420X          | stopgain SNV           | no        |
| 1         | Primary Tumor | USH2A          | 30%                      | c.C12361T      | p.R4121C         | nonsynonymous SNV      | no        |
| 1         | Primary Tumor | WT1            | 22%                      | c.G326C        | p.G109A          | nonsynonymous SNV      | no        |
| 1         | Primary Tumor | MLL            | 19%                      | c.G6745A       | p.V2249I         | nonsynonymous SNV      | no        |
| 1         | Primary Tumor | ERBB3          | 52%                      | c.T3286C       | p.S1096P         | nonsynonymous SNV      | no        |
| 1         | Primary Tumor | PALB2          | 25%                      | c.C2590T       | p.P864S          | nonsynonymous SNV      | no        |
| 1         | Primary Tumor | ERCC3          | 11%                      | c.A248G        | p.H83R           | nonsynonymous SNV      | no        |
| 1         | Primary Tumor | PIK3CA         | 49%                      | c.A3140T       | p.H1047L         | nonsynonymous SNV      | yes       |
| 1         | Primary Tumor | MLL3           | 15%                      | c.C2689T       | p.R897X          | stopgain SNV           | no        |
| 1         | Primary Tumor | AFF2           | 57%                      | c.G1858C       | p.A620P          | nonsynonymous SNV      | no        |
| 1         | Primary Tumor | BARD1          | 49%                      | c.1075_1095del | p.359_365del     | nonframeshift deletion | no        |
| 1         | Metastasis    | ARID1A         | 49%                      | c.C1258T       | p.Q420X          | stopgain SNV           | no        |
| 1         | Metastasis    | USH2A          | 75%                      | c.C12361T      | p.R4121C         | nonsynonymous SNV      | no        |
| 1         | Metastasis    | WT1            | 21%                      | c.G326C        | p.G109A          | nonsynonymous SNV      | no        |
| 1         | Metastasis    | MLL            | 32%                      | c.G6745A       | p.V2249I         | nonsynonymous SNV      | no        |
| 1         | Metastasis    | ERBB3          | 60%                      | c.T3286C       | p.S1096P         | nonsynonymous SNV      | no        |
| 1         | Metastasis    | PALB2          | 66%                      | c.C2590T       | p.P864S          | nonsynonymous SNV      | no        |
| 1         | Metastasis    | ERCC3          | 25%                      | c.A248G        | p.H83R           | nonsynonymous SNV      | no        |
| 1         | Metastasis    | PIK3CA         | 48%                      | c.A3140T       | p.H1047L         | nonsynonymous SNV      | yes       |
| 1         | Metastasis    | MLL3           | 43%                      | c.C2689T       | p.R897X          | stopgain SNV           | no        |
| 1         | Metastasis    | AFF2           | 60%                      | c.G1858C       | p.A620P          | nonsynonymous SNV      | no        |
| 1         | Metastasis    | BARD1          | 52%                      | c.1075_1095del | p.359_365del     | nonframeshift deletion | no        |
| 2         | Primary Tumor | USH2A          | 3%                       | c.A15496G      | p.I5166V         | nonsynonymous SNV      | no        |
| 2         |               | RB1(NM_000321) | 43%                      |                |                  | splicing               | no        |
| 2         |               | TP53           | 17%                      | c.G422T        | p.R141L          | nonsynonymous SNV      | yes       |
| 2         |               | APOB           | 47%                      | c.C4755A       | p.N1585K         | nonsynonymous SNV      | no        |

|   |               |        |     |                |                |                        |     |
|---|---------------|--------|-----|----------------|----------------|------------------------|-----|
| 2 |               | XPC    | 12% | c.G661T        | p.V221L        | nonsynonymous SNV      | no  |
| 2 |               | TBC1D1 | 24% | c.T311A        | p.L104Q        | nonsynonymous SNV      | no  |
| 2 |               | KIT    | 49% | c.T2771C       | p.I924T        | nonsynonymous SNV      | no  |
| 2 |               | TAP1   | 33% | c.185_187del   | p.62_63del     | nonframeshift deletion | no  |
| 2 | Metastasis    | USH2A  | 24% | c.A15496G      | p.I5166V       | nonsynonymous SNV      | no  |
| 2 |               | TP53   | 23% | c.G422T        | p.R141L        | nonsynonymous SNV      | yes |
| 2 |               | ITGA4  | 54% | c.T65C         | p.L22P         | nonsynonymous SNV      | no  |
| 2 |               | XPC    | 10% | c.G661T        | p.V221L        | nonsynonymous SNV      | no  |
| 2 |               | TBC1D1 | 24% | c.T311A        | p.L104Q        | nonsynonymous SNV      | no  |
| 2 |               | KIT    | 34% | c.T2771C       | p.I924T        | nonsynonymous SNV      | no  |
| 2 |               | TRIM23 | 25% | c.C668G        | p.A223G        | nonsynonymous SNV      | no  |
| 2 |               | TRIM23 | 63% | c.T648A        | p.H216Q        | nonsynonymous SNV      | no  |
| 2 |               | CCND3  | 27% | c.C562G        | p.Q188E        | nonsynonymous SNV      | no  |
| 2 |               | POLE   | 20% | c.4780_4788del | p.1594_1596del | nonframeshift deletion | no  |
| 2 |               | NOTCH4 | 80% | c.2811_2844del | p.937_948del   | frameshift deletion    | no  |
| 2 |               | TAP1   | 11% | c.185_187del   | p.62_63del     | nonframeshift deletion | no  |
| 4 | Primary Tumor | NOTCH2 | 31% | c.A7304G       | p.D2435G       | nonsynonymous SNV      | no  |
| 4 |               | PARP1  | 23% | c.G249T        | p.Q83H         | nonsynonymous SNV      | no  |
| 4 |               | PRF1   | 48% | c.A755G        | p.N252S        | nonsynonymous SNV      | no  |
| 4 |               | FANCM  | 50% | c.G2257T       | p.D753Y        | nonsynonymous SNV      | no  |
| 4 |               | TP53   | 35% | c.T304C        | p.Y102H        | nonsynonymous SNV      | yes |
| 4 |               | JAK3   | 49% | c.C62T         | p.T21M         | nonsynonymous SNV      | no  |
| 4 |               | PIK3CA | 7%  | c.A3140G       | p.H1047R       | nonsynonymous SNV      | yes |
| 4 |               | RECQL4 | 31% | c.G2252A       | p.R751Q        | nonsynonymous SNV      | no  |
| 4 |               | FANCB  | 48% | c.G554T        | p.G185V        | nonsynonymous SNV      | no  |
| 4 |               | RB1    | 11% | c.211_214del   | p.71_72del     | frameshift deletion    | no  |

|   |               |                |     |                    |                 |                         |     |
|---|---------------|----------------|-----|--------------------|-----------------|-------------------------|-----|
| 4 |               | CEBPA          | 71% | c.589_590insACCCGC | p.P197delinsHPP | nonframeshift insertion | no  |
| 4 |               | MAP3K4         | 24% | c.81_82insCCG      | p.P27delinsPP   | nonframeshift insertion | no  |
| 4 | Metastasis    | NOTCH2         | 76% | c.A7304G           | p.D2435G        | nonsynonymous SNV       | no  |
| 4 |               | PRF1           | 23% | c.A755G            | p.N252S         | nonsynonymous SNV       | no  |
| 4 |               | MLL(NM_005933) | 46% |                    |                 | splicing                | no  |
| 4 |               | FANCM          | 55% | c.G2257T           | p.D753Y         | nonsynonymous SNV       | no  |
| 4 |               | TP53           | 46% | c.T304C            | p.Y102H         | nonsynonymous SNV       | yes |
| 4 |               | MUC16          | 33% | c.G17356A          | p.D5786N        | nonsynonymous SNV       | no  |
| 4 |               | JAK3           | 32% | c.C62T             | p.T21M          | nonsynonymous SNV       | no  |
| 4 |               | SMARCB1        | 50% | c.G591A            | p.W197X         | stopgain SNV            | no  |
| 4 |               | PIK3CA         | 47% | c.A3140G           | p.H1047R        | nonsynonymous SNV       | yes |
| 4 |               | RECQL4         | 74% | c.G2252A           | p.R751Q         | nonsynonymous SNV       | no  |
| 4 |               | FANCB          | 46% | c.G554T            | p.G185V         | nonsynonymous SNV       | no  |
| 4 |               | NF1            | 86% | c.2027dupC         | p.T676fs        | frameshift insertion    | no  |
| 4 |               | CEBPA          | 38% | c.589_590insACCCGC | p.P197delinsHPP | nonframeshift insertion | no  |
| 4 |               | MAP3K4         | 63% | c.81_82insCCG      | p.P27delinsPP   | nonframeshift insertion | no  |
| 5 | Primary Tumor | MTOR           | 36% | c.A2134G           | p.I712V         | nonsynonymous SNV       | no  |
| 5 |               | IL6R           | 12% | c.T829C            | p.C277R         | nonsynonymous SNV       | no  |
| 5 |               | USH2A          | 9%  | c.A8245G           | p.I2749V        | nonsynonymous SNV       | no  |
| 5 |               | PARP1          | 3%  | c.C193T            | p.R65W          | nonsynonymous SNV       | no  |
| 5 |               | PTPN11         | 31% | c.T854C            | p.F285S         | nonsynonymous SNV       | no  |
| 5 |               | FANCI          | 7%  | c.T3357G           | p.Y1119X        | stopgain SNV            | no  |
| 5 |               | CREBBP         | 39% | c.A4546G           | p.K1516E        | nonsynonymous SNV       | no  |
| 5 |               | PLK1           | 8%  | c.G1648A           | p.V550M         | nonsynonymous SNV       | no  |
| 5 |               | CTCF           | 54% | c.C997T            | p.Q333X         | stopgain SNV            | no  |
| 5 |               | NF1            | 11% | c.G5021A           | p.R1674Q        | nonsynonymous SNV       | no  |
| 5 |               | SMARCA4        | 3%  | c.G2654A           | p.R885H         | nonsynonymous SNV       | no  |
| 5 |               | ARHGAP35       | 5%  | c.C362T            | p.A121V         | nonsynonymous SNV       | no  |

|   |            |          |     |                |                |                        |     |
|---|------------|----------|-----|----------------|----------------|------------------------|-----|
| 5 |            | ARHGAP35 | 55% | c.G457A        | p.G153R        | nonsynonymous SNV      | no  |
| 5 |            | MYCN     | 52% | c.G212A        | p.S71N         | nonsynonymous SNV      | no  |
| 5 |            | CHEK2    | 18% | c.C283T        | p.R95X         | stopgain SNV           | no  |
| 5 |            | PIK3CA   | 21% | c.A3140G       | p.H1047R       | nonsynonymous SNV      | yes |
| 5 |            | NSD1     | 45% | c.C5956T       | p.R1986C       | nonsynonymous SNV      | no  |
| 5 |            | CAP2     | 9%  | c.C1225T       | p.P409S        | nonsynonymous SNV      | no  |
| 5 |            | ARID1B   | 6%  | c.G2611T       | p.G871X        | stopgain SNV           | no  |
| 5 |            | ARID1B   | 69% | c.C6415T       | p.Q2139X       | stopgain SNV           | no  |
| 5 |            | MET      | 15% | c.C2975T       | p.T992I        | nonsynonymous SNV      | no  |
| 5 |            | MLL3     | 32% | c.G12569A      | p.S4190N       | nonsynonymous SNV      | no  |
| 5 |            | EXT1     | 60% | c.A2219G       | p.Y740C        | nonsynonymous SNV      | no  |
| 5 |            | SELP     | 5%  | c.984_985insAA | p.A329fs       | frameshift insertion   | no  |
| 5 |            | BLM      | 5%  | c.1536delA     | p.G512fs       | frameshift deletion    | no  |
| 5 |            | MSH6     | 68% | c.3254dupC     | p.T1085fs      | frameshift insertion   | no  |
| 5 |            | MAP3K1   | 16% | c.2668delC     | p.P890fs       | frameshift deletion    | no  |
| 5 |            | TEK      | 17% | c.2980delA     | p.K994fs       | frameshift deletion    | no  |
| 5 |            | NOTCH1   | 3%  | c.4732_4734del | p.1578_1578del | nonframeshift deletion | no  |
| 5 | Metastasis | MTOR     | 13% | c.A2134G       | p.I712V        | nonsynonymous SNV      | no  |
| 5 |            | PARP1    | 21% | c.C193T        | p.R65W         | nonsynonymous SNV      | no  |
| 5 |            | MLL2     | 39% | c.G14243A      | p.S4748N       | nonsynonymous SNV      | no  |
| 5 |            | CTCF     | 30% | c.C997T        | p.Q333X        | stopgain SNV           | no  |
| 5 |            | TP53     | 52% | c.C421T        | p.R141C        | nonsynonymous SNV      | yes |
| 5 |            | SMAD4    | 14% | c.C821T        | p.A274V        | nonsynonymous SNV      | no  |
| 5 |            | ARHGAP35 | 11% | c.C362T        | p.A121V        | nonsynonymous SNV      | no  |
| 5 |            | DNER     | 24% | c.T1807C       | p.Y603H        | nonsynonymous SNV      | no  |
| 5 |            | CHEK2    | 51% | c.C283T        | p.R95X         | stopgain SNV           | no  |
| 5 |            | PIK3CA   | 28% | c.A3140G       | p.H1047R       | nonsynonymous SNV      | yes |
| 5 |            | MET      | 29% | c.C2975T       | p.T992I        | nonsynonymous SNV      | no  |



|   |               |           |     |                                             |                           |                         |    |
|---|---------------|-----------|-----|---------------------------------------------|---------------------------|-------------------------|----|
| 5 |               | MLL3      | 40% | c.A13442G                                   | p.N4481S                  | nonsynonymous SNV       | no |
| 5 |               | MLL3      | 20% | c.G12569A                                   | p.S4190N                  | nonsynonymous SNV       | no |
| 5 |               | ANGPT2    | 16% | c.T1177C                                    | p.W393R                   | nonsynonymous SNV       | no |
| 5 |               | TNFRSF10A | 44% | c.A352G                                     | p.I118V                   | nonsynonymous SNV       | no |
| 5 |               | SELP      | 15% | c.984_985insAA                              | p.A329fs                  | frameshift insertion    | no |
| 5 |               | FLT3      | 48% | c.1863dupT                                  | p.G622fs                  | frameshift insertion    | no |
| 5 |               | BLM       | 32% | c.1536delA                                  | p.G512fs                  | frameshift deletion     | no |
| 5 |               | ZFH3      | 55% | c.1037dupA                                  | p.N346fs                  | frameshift insertion    | no |
| 5 |               | MSH6      | 67% | c.3253_3254insCC                            | p.T1085fs                 | frameshift insertion    | no |
| 5 |               | MAP3K1    | 18% | c.2668delC                                  | p.P890fs                  | frameshift deletion     | no |
| 5 |               | FGFR4     | 16% | c.1578delC                                  | p.R526fs                  | frameshift deletion     | no |
| 5 |               | NBN       | 61% | c.1396delA                                  | p.R466fs                  | frameshift deletion     | no |
| 5 |               | NOTCH1    | 23% | c.4732_4734del                              | p.1578_1578del            | nonframeshift deletion  | no |
| 6 | Primary Tumor | SELP      | 19% | c.C1229A                                    | p.T410N                   | nonsynonymous SNV       | no |
| 6 |               | PARP1     | 20% | c.G2413A                                    | p.D805N                   | nonsynonymous SNV       | no |
| 6 |               | NCOR2     | 46% | c.A2365G                                    | p.T789A                   | nonsynonymous SNV       | no |
| 6 |               | CDH1      | 28% | c.C187T                                     | p.R63X                    | stopgain SNV            | no |
| 6 |               | NF1       | 69% | c.G847T                                     | p.D283Y                   | nonsynonymous SNV       | no |
| 6 |               | MUC16     | 34% | c.G40547A                                   | p.R13516K                 | nonsynonymous SNV       | no |
| 6 |               | MUC16     | 51% | c.C22046T                                   | p.P7349L                  | nonsynonymous SNV       | no |
| 6 |               | PDGFRB    | 4%  | c.G1487A                                    | p.R496H                   | nonsynonymous SNV       | no |
| 6 |               | EGFL7     | 41% | c.G379A                                     | p.A127T                   | nonsynonymous SNV       | no |
| 6 |               | CDH1      | 58% | c.110dupA                                   | p.Y37_T38delinsX          | stopgain SNV            | no |
| 6 |               | ZFH3      | 21% | c.6886_6887insAGCAA<br>CCACAGGTGCAGCA<br>GC | p.P2296delinsQQ<br>PQVQQP | nonframeshift insertion | no |
| 6 | Metastasis    | SELP      | 36% | c.C1229A                                    | p.T410N                   | nonsynonymous SNV       | no |
| 6 |               | USH2A     | 47% | c.C8263G                                    | p.L2755V                  | nonsynonymous SNV       | no |
| 6 |               | PARP1     | 38% | c.G2413A                                    | p.D805N                   | nonsynonymous SNV       | no |

|   |                  |         |     |                                             |                           |                            |     |
|---|------------------|---------|-----|---------------------------------------------|---------------------------|----------------------------|-----|
| 6 |                  | NCOR2   | 49% | c.A2365G                                    | p.T789A                   | nonsynonymous SNV          | no  |
| 6 |                  | POLE    | 22% | c.G6784T                                    | p.A2262S                  | nonsynonymous SNV          | no  |
| 6 |                  | NF1     | 77% | c.G847T                                     | p.D283Y                   | nonsynonymous SNV          | no  |
| 6 |                  | SMAD4   | 33% | c.C725G                                     | p.S242X                   | stopgain SNV               | no  |
| 6 |                  | MUC16   | 55% | c.G40547A                                   | p.R13516K                 | nonsynonymous SNV          | no  |
| 6 |                  | MUC16   | 9%  | c.C22046T                                   | p.P7349L                  | nonsynonymous SNV          | no  |
| 6 |                  | DIAPH1  | 40% | c.G2948A                                    | p.R983K                   | nonsynonymous SNV          | no  |
| 6 |                  | PDGFRB  | 33% | c.G1487A                                    | p.R496H                   | nonsynonymous SNV          | no  |
| 6 |                  | EGFL7   | 64% | c.G379A                                     | p.A127T                   | nonsynonymous SNV          | no  |
| 6 |                  | ATRX    | 52% | c.T965A                                     | p.I322N                   | nonsynonymous SNV          | no  |
| 6 |                  | CDH1    | 18% | c.110dupA                                   | p.Y37_T38delinsX          | stopgain SNV               | no  |
| 6 |                  | ZFH3    | 16% | c.6886_6887insAGCAA<br>CCACAGGTGCAGCA<br>GC | p.P2296delinsQQ<br>PQVQQP | nonframeshift<br>insertion | no  |
| 7 | Primary<br>Tumor | CD248   | 44% | c.C191T                                     | p.P64L                    | nonsynonymous SNV          | no  |
| 7 |                  | BRCA2   | 78% | c.G4585A                                    | p.G1529R                  | nonsynonymous SNV          | no  |
| 7 |                  | BRCA2   | 22% | c.A9976T                                    | p.K3326X                  | stopgain SNV               | no  |
| 7 |                  | TP53    | 39% | c.G128A                                     | p.R43H                    | nonsynonymous SNV          | yes |
| 7 |                  | MUC16   | 21% | c.C16572G                                   | p.I5524M                  | nonsynonymous SNV          | no  |
| 7 |                  | SMARCA4 | 49% | c.C2559A                                    | p.F853L                   | nonsynonymous SNV          | no  |
| 7 |                  | XPC     | 48% | c.C146G                                     | p.S49C                    | nonsynonymous SNV          | no  |
| 7 |                  | MLLT4   | 46% | c.G4600T                                    | p.A1534S                  | nonsynonymous SNV          | no  |
| 7 |                  | EPHA2   | 22% | c.987delC                                   | p.P329fs                  | frameshift<br>deletion     | no  |
| 7 |                  | RB1     | 47% | c.1193delA                                  | p.E398fs                  | frameshift<br>deletion     | no  |
| 7 |                  | ARID1B  | 45% | c.339_340insCAG                             | p.F113delinsFQ            | nonframeshift<br>insertion | no  |
| 7 | Metastasis       | BRCA2   | 45% | c.G4585A                                    | p.G1529R                  | nonsynonymous SNV          | no  |
| 7 |                  | BRCA2   | 44% | c.A9976T                                    | p.K3326X                  | stopgain SNV               | no  |
| 7 |                  | TP53    | 46% | c.G128A                                     | p.R43H                    | nonsynonymous SNV          | yes |
| 7 |                  | MUC16   | 48% | c.C16572G                                   | p.I5524M                  | nonsynonymous SNV          | no  |

|   |               |         |     |                     |                 |                         |     |
|---|---------------|---------|-----|---------------------|-----------------|-------------------------|-----|
| 7 |               | SMARCA4 | 53% | c.C2559A            | p.F853L         | nonsynonymous SNV       | no  |
| 7 |               | MYH9    | 3%  | c.G1425C            | p.K475N         | nonsynonymous SNV       | no  |
| 7 |               | XPC     | 3%  | c.C146G             | p.S49C          | nonsynonymous SNV       | no  |
| 7 |               | MLLT4   | 2%  | c.G4600T            | p.A1534S        | nonsynonymous SNV       | no  |
| 7 |               | ARID1B  | 4%  | c.339_340insCAG     | p.F113delinsFQ  | nonframeshift insertion | no  |
| 8 | Primary Tumor | MTOR    | 6%  | c.C1393T            | p.P465S         | nonsynonymous SNV       | no  |
| 8 |               | FOXA1   | 46% | c.A586G             | p.I196V         | nonsynonymous SNV       | no  |
| 8 |               | SMARCA4 | 17% | c.C622T             | p.R208W         | nonsynonymous SNV       | no  |
| 8 |               | CD22    | 20% | c.G896T             | p.G299V         | nonsynonymous SNV       | no  |
| 8 |               | SOS1    | 48% | c.C3257G            | p.P1086R        | nonsynonymous SNV       | no  |
| 8 |               | PIK3CA  | 36% | c.G1633A            | p.E545K         | nonsynonymous SNV       | yes |
| 8 |               | PMS2    | 3%  | c.C1437G            | p.H479Q         | nonsynonymous SNV       | no  |
| 8 |               | CUX1    | 54% | c.C286T             | p.L96F          | nonsynonymous SNV       | no  |
| 8 |               | MLL3    | 15% | c.G6695A            | p.G2232D        | nonsynonymous SNV       | no  |
| 8 |               | PTCH1   | 17% | c.C3317T            | p.T1106M        | nonsynonymous SNV       | no  |
| 8 |               | MEN1    | 42% | c.312_313del        | p.104_105del    | frameshift deletion     | no  |
| 8 |               | SOX17   | 23% | c.948_949insCACCCAG | p.Q316delinsQHQ | nonframeshift insertion | no  |
| 8 | Metastasis    | MTOR    | 43% | c.C1393T            | p.P465S         | nonsynonymous SNV       | no  |
| 8 |               | SELP    | 52% | c.C393G             | p.C131W         | nonsynonymous SNV       | no  |
| 8 |               | MEN1    | 40% | c.A1477T            | p.K493X         | stopgain SNV            | no  |
| 8 |               | SOS1    | 5%  | c.C3257G            | p.P1086R        | nonsynonymous SNV       | no  |
| 8 |               | PMS2    | 37% | c.C1437G            | p.H479Q         | nonsynonymous SNV       | no  |
| 8 |               | CUX1    | 49% | c.C286T             | p.L96F          | nonsynonymous SNV       | no  |
| 8 |               | MLL3    | 7%  | c.G6695A            | p.G2232D        | nonsynonymous SNV       | no  |
| 8 |               | MLL3    | 40% | c.C3114A            | p.D1038E        | nonsynonymous SNV       | no  |
| 8 |               | SOX17   | 12% | c.948_949insCACCCAG | p.Q316delinsQHQ | nonframeshift insertion | no  |
| 9 | Primary Tumor | USH2A   | 53% | c.A6347G            | p.H2116R        | nonsynonymous SNV       | no  |

|   |            |        |     |              |           |                        |     |
|---|------------|--------|-----|--------------|-----------|------------------------|-----|
| 9 |            | BRCA2  | 57% | c.A6347G     | p.H2116R  | nonsynonymous SNV      | no  |
| 9 |            | NOTCH3 | 26% | c.G4755T     | p.E1585D  | nonsynonymous SNV      | no  |
| 9 |            | APOB   | 47% | c.A4181G     | p.D1394G  | nonsynonymous SNV      | no  |
| 9 |            | PIK3CA | 41% | c.G353A      | p.G118D   | nonsynonymous SNV      | yes |
| 9 |            | NSD1   | 23% | c.G3056A     | p.R1019H  | nonsynonymous SNV      | no  |
| 9 |            | NBN    | 38% | c.C643T      | p.R215W   | nonsynonymous SNV      | no  |
| 9 |            | FANCG  | 17% | c.G934A      | p.V312I   | nonsynonymous SNV      | no  |
| 9 |            | CDKN2A | 56% | c.9_32del    | p.3_11del | nonframeshift deletion | no  |
| 9 | Metastasis | ARID1A | 46% | c.G232T      | p.E78X    | stopgain SNV           | no  |
| 9 |            | ARID1A | 25% | c.G5326A     | p.E1776K  | nonsynonymous SNV      | no  |
| 9 |            | ARID1A | 18% | c.G5335T     | p.E1779X  | stopgain SNV           | no  |
| 9 |            | USH2A  | 18% | c.A6347G     | p.H2116R  | nonsynonymous SNV      | no  |
| 9 |            | SIRT1  | 11% | c.C704A      | p.T235K   | nonsynonymous SNV      | no  |
| 9 |            | BRCA2  | 75% | c.A6347G     | p.H2116R  | nonsynonymous SNV      | no  |
| 9 |            | NOTCH3 | 48% | c.G4755T     | p.E1585D  | nonsynonymous SNV      | no  |
| 9 |            | APOB   | 40% | c.A4181G     | p.D1394G  | nonsynonymous SNV      | no  |
| 9 |            | MSH2   | 30% | c.G900A      | p.M300I   | nonsynonymous SNV      | no  |
| 9 |            | BAP1   | 52% | c.G1492C     | p.E498Q   | nonsynonymous SNV      | no  |
| 9 |            | PIK3CA | 11% | c.G353A      | p.G118D   | nonsynonymous SNV      | yes |
| 9 |            | PIK3CA | 29% | c.G2176A     | p.E726K   | nonsynonymous SNV      | no  |
| 9 |            | NSD1   | 39% | c.G3056A     | p.R1019H  | nonsynonymous SNV      | no  |
| 9 |            | NOTCH4 | 31% | c.G1531A     | p.E511K   | nonsynonymous SNV      | no  |
| 9 |            | VEGFA  | 18% | c.G403T      | p.A135S   | nonsynonymous SNV      | no  |
| 9 |            | ESR1   | 28% | c.G1086C     | p.K362N   | nonsynonymous SNV      | no  |
| 9 |            | NBN    | 29% | c.C643T      | p.R215W   | nonsynonymous SNV      | no  |
| 9 |            | FANCG  | 14% | c.G934A      | p.V312I   | nonsynonymous SNV      | no  |
| 9 |            | CDH1   | 56% | c.80_81insCT | p.P27fs   | frameshift insertion   | no  |

|    |               |        |     |              |            |                        |     |
|----|---------------|--------|-----|--------------|------------|------------------------|-----|
| 9  |               | CDKN2A | 25% | c.9_32del    | p.3_11del  | nonframeshift deletion | no  |
| 10 | Primary Tumor | SDHB   | 38% | c.T487C      | p.S163P    | nonsynonymous SNV      | no  |
| 10 |               | AKT1   | 37% | c.G130A      | p.D44N     | nonsynonymous SNV      | no  |
| 10 |               | AKT1   | 51% | c.G49A       | p.E17K     | nonsynonymous SNV      | yes |
| 10 |               | ITGAL  | 16% | c.A103G      | p.S35G     | nonsynonymous SNV      | no  |
| 10 |               | JAK3   | 39% | c.A757G      | p.T253A    | nonsynonymous SNV      | no  |
| 10 |               | CD22   | 53% | c.A1028C     | p.H343P    | nonsynonymous SNV      | no  |
| 10 |               | TPX2   | 26% | c.C20A       | p.S7Y      | nonsynonymous SNV      | no  |
| 10 |               | EP300  | 52% | c.G3787T     | p.E1263X   | stopgain SNV           | no  |
| 10 |               | FAT1   | 47% | c.A5320G     | p.I1774V   | nonsynonymous SNV      | no  |
| 10 | Metastasis    | SDHB   | 95% | c.T487C      | p.S163P    | nonsynonymous SNV      | no  |
| 10 |               | AKT1   | 95% | c.G130A      | p.D44N     | nonsynonymous SNV      | no  |
| 10 |               | AKT1   | 68% | c.G49A       | p.E17K     | nonsynonymous SNV      | yes |
| 10 |               | ITGAL  | 31% | c.A103G      | p.S35G     | nonsynonymous SNV      | no  |
| 10 |               | JAK3   | 31% | c.A757G      | p.T253A    | nonsynonymous SNV      | no  |
| 10 |               | CD22   | 13% | c.A1028C     | p.H343P    | nonsynonymous SNV      | no  |
| 10 |               | TPX2   | 46% | c.C20A       | p.S7Y      | nonsynonymous SNV      | no  |
| 10 |               | FAT1   | 32% | c.A5320G     | p.I1774V   | nonsynonymous SNV      | no  |
| 11 | Primary Tumor | ANK3   | 57% | c.T2544A     | p.D848E    | nonsynonymous SNV      | no  |
| 11 |               | TP53   | 49% | c.G317A      | p.C106Y    | nonsynonymous SNV      | yes |
| 11 |               | MUC16  | 48% | c.G6967T     | p.A2323S   | nonsynonymous SNV      | no  |
| 11 |               | MLL3   | 13% | c.C11381G    | p.P3794R   | nonsynonymous SNV      | no  |
| 11 |               | PTEN   | 18% | c.281_287del | p.94_96del | frameshift deletion    | no  |
| 11 |               | NCAM1  | 19% | c.481dupA    | p.L160fs   | frameshift insertion   | no  |
| 11 | Metastasis    | ANK3   | 52% | c.T2544A     | p.D848E    | nonsynonymous SNV      | no  |
| 11 |               | SACS   | ND  | c.G8900A     | p.R2967H   | nonsynonymous SNV      | no  |
| 11 |               | TP53   | 47% | c.G317A      | p.C106Y    | nonsynonymous SNV      | yes |

|    |               |        |     |                                                            |                               |                         |     |
|----|---------------|--------|-----|------------------------------------------------------------|-------------------------------|-------------------------|-----|
| 11 |               | MUC16  | 51% | c.G6967T                                                   | p.A2323S                      | nonsynonymous SNV       | no  |
| 11 |               | MLL3   | 13% | c.C11381G                                                  | p.P3794R                      | nonsynonymous SNV       | no  |
| 11 |               | GNAS   | 6%  | c.1189_1190insTGACGC<br>CCCAGCCGATCCCGA<br>CTCCGGGGCGGCCCG | p.L397delinsLT<br>PQPIPTPGRPV | nonframeshift insertion | no  |
| 12 | Primary Tumor | USH2A  | 12% | c.T7685C                                                   | p.V2562A                      | nonsynonymous SNV       | no  |
| 12 |               | SACS   | 62% | c.T11739G                                                  | p.D3913E                      | nonsynonymous SNV       | no  |
| 12 |               | MSH6   | 44% | c.G431T                                                    | p.S144I                       | nonsynonymous SNV       | no  |
| 12 |               | ITGAV  | 25% | c.C1510T                                                   | p.R504X                       | stopgain SNV            | no  |
| 12 |               | PIK3CA | 24% | c.G1624A                                                   | p.E542K                       | nonsynonymous SNV       | yes |
| 12 |               | GATA3  | 34% | c.994_995insC                                              | p.N332fs                      | frameshift insertion    | no  |
| 12 | Metastasis    | USH2A  | 17% | c.T7685C                                                   | p.V2562A                      | nonsynonymous SNV       | no  |
| 12 |               | SACS   | 50% | c.T11739G                                                  | p.D3913E                      | nonsynonymous SNV       | no  |
| 12 |               | MSH6   | 39% | c.G431T                                                    | p.S144I                       | nonsynonymous SNV       | no  |
| 12 |               | ITGAV  | 67% | c.C1510T                                                   | p.R504X                       | stopgain SNV            | no  |
| 12 |               | PIK3CA | 19% | c.G1624A                                                   | p.E542K                       | nonsynonymous SNV       | yes |
| 12 |               | GATA3  | 41% | c.994_995insC                                              | p.N332fs                      | frameshift insertion    | no  |
| 13 | Primary Tumor | GATA3  | 31% | c.T100G                                                    | p.S34A                        | nonsynonymous SNV       | no  |
| 13 |               | TP53   | 23% | c.T259G                                                    | p.Y87D                        | nonsynonymous SNV       | no  |
| 13 |               | MUC16  | 13% | c.A19619G                                                  | p.H6540R                      | nonsynonymous SNV       | no  |
| 13 |               | DNER   | 73% | c.G2011C                                                   | p.G671R                       | nonsynonymous SNV       | no  |
| 13 |               | PIK3CA | 41% | c.A3140G                                                   | p.H1047R                      | nonsynonymous SNV       | yes |
| 13 |               | PTCH1  | 15% | c.G3890A                                                   | p.R1297Q                      | nonsynonymous SNV       | no  |
| 13 |               | KDM6A  | 61% | c.T3599G                                                   | p.L1200R                      | nonsynonymous SNV       | no  |
| 13 |               | TBX3   | 53% | c.951_952insA                                              | p.E318fs                      | frameshift insertion    | no  |
| 13 | Metastasis    | GATA3  | 20% | c.T100G                                                    | p.S34A                        | nonsynonymous SNV       | no  |
| 13 |               | TP53   | 44% | c.T259G                                                    | p.Y87D                        | nonsynonymous SNV       | no  |
| 13 |               | MUC16  | 91% | c.A19619G                                                  | p.H6540R                      | nonsynonymous SNV       | no  |
| 13 |               | NOTCH3 | 12% | c.G4285A                                                   | p.E1429K                      | nonsynonymous SNV       | no  |

|    |               |        |     |                    |                 |                         |     |
|----|---------------|--------|-----|--------------------|-----------------|-------------------------|-----|
| 13 |               | DNER   | 46% | c.G2011C           | p.G671R         | nonsynonymous SNV       | no  |
| 13 |               | PIK3CA | 81% | c.A3140G           | p.H1047R        | nonsynonymous SNV       | yes |
| 13 |               | TBX3   | 75% | c.951_952insA      | p.E318fs        | frameshift insertion    | no  |
| 14 | Primary Tumor | EXT2   | 18% | c.G683T            | p.G228V         | nonsynonymous SNV       | no  |
| 14 |               | POLE   | 60% | c.T4418C           | p.L1473P        | nonsynonymous SNV       | no  |
| 14 |               | SOS1   | 19% | c.G2748T           | p.L916F         | nonsynonymous SNV       | no  |
| 14 |               | NOTCH4 | 37% | c.G5693C           | p.R1898P        | nonsynonymous SNV       | no  |
| 14 |               | ROS1   | 31% | c.A2672T           | p.Y891F         | nonsynonymous SNV       | no  |
| 14 |               | JAK2   | 18% | c.A967G            | p.I323V         | nonsynonymous SNV       | no  |
| 14 |               | TP53   | 71% | c.438_445del       | p.146_149del    | frameshift deletion     | no  |
| 14 |               | TP53   | 70% | c.433_436del       | p.145_146del    | frameshift deletion     | no  |
| 14 | Metastasis    | EXT2   | 21% | c.G683T            | p.G228V         | nonsynonymous SNV       | no  |
| 14 |               | POLE   | 48% | c.T4418C           | p.L1473P        | nonsynonymous SNV       | no  |
| 14 |               | NOTCH4 | 18% | c.G5693C           | p.R1898P        | nonsynonymous SNV       | no  |
| 14 |               | ROS1   | 30% | c.A2672T           | p.Y891F         | nonsynonymous SNV       | no  |
| 14 |               | JAK2   | 26% | c.A967G            | p.I323V         | nonsynonymous SNV       | no  |
| 14 |               | TP53   | 45% | c.438_445del       | p.146_149del    | frameshift deletion     | no  |
| 14 |               | TP53   | 45% | c.433_436del       | p.145_146del    | frameshift deletion     | no  |
| 15 | Primary Tumor | FLT4   | 33% | c.C2860T           | p.P954S         | nonsynonymous SNV       | no  |
| 15 |               | PTCH1  | 53% | c.G192C            | p.Q64H          | nonsynonymous SNV       | no  |
| 15 |               | GATA3  | 6%  | c.989dupG          | p.R330fs        | frameshift insertion    | no  |
| 15 |               | CEBPA  | 49% | c.589_590insACCCGC | p.P197delinsHPP | nonframeshift insertion | no  |
| 15 | Metastasis    | PTEN   | 46% | c.C733T            | p.Q245X         | stopgain SNV            | no  |
| 15 |               | FLT4   | 55% | c.C2860T           | p.P954S         | nonsynonymous SNV       | no  |
| 15 |               | PTCH1  | 8%  | c.G192C            | p.Q64H          | nonsynonymous SNV       | no  |
| 15 |               | GATA3  | 46% | c.989dupG          | p.R330fs        | frameshift insertion    | no  |
| 15 |               | CEBPA  | 30% | c.589_590insACCCGC | p.P197delinsHPP | nonframeshift insertion | no  |

|    |               |        |     |                    |                 |                         |     |
|----|---------------|--------|-----|--------------------|-----------------|-------------------------|-----|
| 16 | Primary Tumor | NTRK1  | 40% | c.G1564A           | p.E522K         | nonsynonymous SNV       | no  |
| 16 |               | ANK3   | 10% | c.G10408A          | p.E3470K        | nonsynonymous SNV       | no  |
| 16 |               | ATM    | 75% | c.C146G            | p.S49C          | nonsynonymous SNV       | no  |
| 16 |               | MLL    | 7%  | c.C6797T           | p.S2266F        | nonsynonymous SNV       | no  |
| 16 |               | CDKN1B | 13% | c.C413G            | p.S138W         | nonsynonymous SNV       | no  |
| 16 |               | MLL2   | 8%  | c.C12101T          | p.S4034F        | nonsynonymous SNV       | no  |
| 16 |               | SACS   | 58% | c.C10999T          | p.H3667Y        | nonsynonymous SNV       | no  |
| 16 |               | DICER1 | 19% | c.G4360C           | p.D1454H        | nonsynonymous SNV       | no  |
| 16 |               | FANCI  | 5%  | c.T3454G           | p.F1152V        | nonsynonymous SNV       | no  |
| 16 |               | TSC2   | 9%  | c.G700T            | p.E234X         | stopgain SNV            | no  |
| 16 |               | ITGAL  | 12% | c.G1525A           | p.E509K         | nonsynonymous SNV       | no  |
| 16 |               | TP53   | 61% | c.C61T             | p.P21S          | nonsynonymous SNV       | no  |
| 16 |               | GNAS   | 5%  | c.C421T            | p.P141S         | nonsynonymous SNV       | no  |
| 16 |               | MYH9   | 8%  | c.C5408T           | p.S1803F        | nonsynonymous SNV       | no  |
| 16 |               | MYH9   | 34% | c.G2785A           | p.E929K         | nonsynonymous SNV       | no  |
| 16 |               | EP300  | 8%  | c.G4653C           | p.K1551N        | nonsynonymous SNV       | no  |
| 16 |               | PIK3CA | 32% | c.C1616G           | p.P539R         | nonsynonymous SNV       | yes |
| 16 |               | MAP3K4 | 40% | c.C3801G           | p.I1267M        | nonsynonymous SNV       | no  |
| 16 |               | RECQL4 | 11% | c.G3331C           | p.E1111Q        | nonsynonymous SNV       | no  |
| 16 |               | PTPRD  | 8%  | c.A1932C           | p.E644D         | nonsynonymous SNV       | no  |
| 16 |               | AMER1  | 6%  | c.A3388G           | p.N1130D        | nonsynonymous SNV       | no  |
| 16 |               | FAT1   | 30% | c.3038_3053del     | p.1013_1018del  | frameshift deletion     | no  |
| 16 |               | SOX17  | 14% | c.948_949insCACCAG | p.Q316delinsQHQ | nonframeshift insertion | no  |
| 16 | Metastasis    | JAK1   | 42% | c.A2579C           | p.K860T         | nonsynonymous SNV       | no  |
| 16 |               | NTRK1  | 17% | c.G1564A           | p.E522K         | nonsynonymous SNV       | no  |
| 16 |               | ANK3   | 68% | c.G10408A          | p.E3470K        | nonsynonymous SNV       | no  |
| 16 |               | HRAS   | 16% | c.C461G            | p.S154C         | nonsynonymous SNV       | no  |



|    |               |                 |     |                     |                 |                         |     |
|----|---------------|-----------------|-----|---------------------|-----------------|-------------------------|-----|
| 16 |               | WT1             | 15% | c.C59T              | p.S20F          | nonsynonymous SNV       | no  |
| 16 |               | ATM             | 16% | c.C146G             | p.S49C          | nonsynonymous SNV       | no  |
| 16 |               | MLL             | 52% | c.C6797T            | p.S2266F        | nonsynonymous SNV       | no  |
| 16 |               | MLL2            | 34% | c.C12101T           | p.S4034F        | nonsynonymous SNV       | no  |
| 16 |               | DICER1          | 23% | c.G4360C            | p.D1454H        | nonsynonymous SNV       | no  |
| 16 |               | FANCI           | 13% | c.T3454G            | p.F1152V        | nonsynonymous SNV       | no  |
| 16 |               | TSC2            | 65% | c.G700T             | p.E234X         | stopgain SNV            | no  |
| 16 |               | ERCC4           | 15% | c.G2284C            | p.D762H         | nonsynonymous SNV       | no  |
| 16 |               | TP53            | 31% | c.C61T              | p.P21S          | nonsynonymous SNV       | no  |
| 16 |               | MYH9            | 9%  | c.G2785A            | p.E929K         | nonsynonymous SNV       | no  |
| 16 |               | EP300           | 46% | c.C724G             | p.L242V         | nonsynonymous SNV       | no  |
| 16 |               | PIK3CA          | 54% | c.C1616G            | p.P539R         | nonsynonymous SNV       | yes |
| 16 |               | RECQL4          | 17% | c.G3331C            | p.E1111Q        | nonsynonymous SNV       | no  |
| 16 |               | PTPRD           | 5%  | c.A1932C            | p.E644D         | nonsynonymous SNV       | no  |
| 16 |               | AMER1           | 30% | c.A3388G            | p.N1130D        | nonsynonymous SNV       | no  |
| 16 |               | FAT1            | 17% | c.3038_3053del      | p.1013_1018del  | frameshift deletion     | no  |
| 16 |               | SOX17           | 12% | c.948_949insCACCCAG | p.Q316delinsQHQ | nonframeshift insertion | no  |
| 17 | Primary Tumor | ANK3            | 21% | c.G2202T            | p.Q734H         | nonsynonymous SNV       | no  |
| 17 |               | SDHD            | 20% | c.G34A              | p.V12I          | nonsynonymous SNV       | no  |
| 17 |               | CHD4(NM_001273) | 44% |                     |                 | splicing                | no  |
| 17 |               | MLL2            | 20% | c.G8489A            | p.R2830Q        | nonsynonymous SNV       | no  |
| 17 |               | AKT1            | 11% | c.G49A              | p.E17K          | nonsynonymous SNV       | yes |
| 17 |               | FES             | 7%  | c.C1771T            | p.R591C         | nonsynonymous SNV       | no  |
| 17 |               | CDH1            | 53% | c.C67T              | p.Q23X          | stopgain SNV            | no  |
| 17 |               | NF1(NM_000267)  | 28% |                     |                 | splicing                | no  |
| 17 |               | ROS1            | 18% | c.C2232G            | p.S744R         | nonsynonymous SNV       | no  |
| 17 |               | RECQL4          | 18% | c.C2920G            | p.L974V         | nonsynonymous SNV       | no  |
| 17 |               | BCOR            | 44% | c.C247T             | p.R83W          | nonsynonymous SNV       | no  |

|    |               |                 |     |                                                                         |              |                        |     |
|----|---------------|-----------------|-----|-------------------------------------------------------------------------|--------------|------------------------|-----|
| 17 |               | CDKN1B          | 41% | c.280dupC                                                               | p.R93fs      | frameshift insertion   | no  |
| 17 |               | MLL3            | 47% | c.13896_13897insAGGT                                                    | p.V4633fs    | frameshift insertion   | no  |
| 17 | Metastasis    | SIRT1           | 23% | c.C202A                                                                 | p.H68N       | nonsynonymous SNV      | no  |
| 17 |               | SDHD            | ND  | c.G34A                                                                  | p.V12I       | nonsynonymous SNV      | no  |
| 17 |               | CHD4(NM_001273) | 46% |                                                                         |              | splicing               | no  |
| 17 |               | MLL2            | 18% | c.G8489A                                                                | p.R2830Q     | nonsynonymous SNV      | no  |
| 17 |               | AKT1            | 10% | c.G49A                                                                  | p.E17K       | nonsynonymous SNV      | yes |
| 17 |               | FES             | 49% | c.C1771T                                                                | p.R591C      | nonsynonymous SNV      | no  |
| 17 |               | CDH1            | 29% | c.C67T                                                                  | p.Q23X       | stopgain SNV           | no  |
| 17 |               | ROS1            | 22% | c.C2232G                                                                | p.S744R      | nonsynonymous SNV      | no  |
| 17 |               | RECQL4          | 42% | c.C2920G                                                                | p.L974V      | nonsynonymous SNV      | no  |
| 17 |               | BCOR            | 51% | c.C247T                                                                 | p.R83W       | nonsynonymous SNV      | no  |
| 17 |               | ARID2           | 46% | c.405_406insCACAGTG<br>TGTCGCTGGTGCGGT<br>CTCATCTTCCTACAAT<br>TACCAGCAT | p.Q135fs     | frameshift insertion   | no  |
| 17 |               | MLL3            | 20% | c.13896_13897insAGGT                                                    | p.V4633fs    | frameshift insertion   | no  |
| 18 | Primary Tumor | AXL             | 47% | c.G1412A                                                                | p.R471H      | nonsynonymous SNV      | no  |
| 18 |               | CTNNB1          | 45% | c.T185C                                                                 | p.V62A       | nonsynonymous SNV      | no  |
| 18 |               | BAP1            | 17% | c.G1643A                                                                | p.R548H      | nonsynonymous SNV      | no  |
| 18 |               | PIK3CA          | 14% | c.A3140T                                                                | p.H1047L     | nonsynonymous SNV      | yes |
| 18 |               | APC             | 45% | c.G3895C                                                                | p.E1299Q     | nonsynonymous SNV      | no  |
| 18 |               | NOTCH4          | 42% | c.A1360C                                                                | p.N454H      | nonsynonymous SNV      | no  |
| 18 |               | BRAF            | 11% | c.G772T                                                                 | p.G258C      | nonsynonymous SNV      | no  |
| 18 |               | VEGFB           | 24% | c.468_473del                                                            | p.156_158del | nonframeshift deletion | no  |
| 18 |               | TP53            | 43% | c.261dupC                                                               | p.Y88fs      | frameshift insertion   | no  |
| 18 | Metastasis    | CTNNB1          | 43% | c.T185C                                                                 | p.V62A       | nonsynonymous SNV      | no  |
| 18 |               | PIK3CA          | 43% | c.A3140T                                                                | p.H1047L     | nonsynonymous SNV      | yes |
| 18 |               | APC             | 12% | c.G3895C                                                                | p.E1299Q     | nonsynonymous SNV      | no  |

|    |               |          |     |                |               |                         |     |
|----|---------------|----------|-----|----------------|---------------|-------------------------|-----|
| 18 |               | VEGFB    | 14% | c.468_473del   | p.156_158del  | nonframeshift deletion  | no  |
| 18 |               | TP53     | 51% | c.261dupC      | p.Y88fs       | frameshift insertion    | no  |
| 20 | Primary Tumor | SACS     | 58% | c.G12346T      | p.D4116Y      | nonsynonymous SNV       | no  |
| 20 |               | MAX      | 22% | c.296-1G>T     |               | splicing                | no  |
| 20 |               | ERCC4    | 53% | c.T2551G       | p.F851V       | nonsynonymous SNV       | no  |
| 20 |               | ARHGAP35 | 40% | c.T3284G       | p.V1095G      | nonsynonymous SNV       | no  |
| 20 |               | EP300    | 15% | c.A3377G       | p.N1126S      | nonsynonymous SNV       | no  |
| 20 |               | PIK3CA   | 55% | c.A3140G       | p.H1047R      | nonsynonymous SNV       | yes |
| 20 |               | NOTCH1   | 24% | c.A5137G       | p.N1713D      | nonsynonymous SNV       | no  |
| 20 |               | MAP3K4   | 61% | c.81_82insCCG  | p.P27delinsPP | nonframeshift insertion | no  |
| 20 | Metastasis    | USH2A    | 56% | c.C11881G      | p.L3961V      | nonsynonymous SNV       | no  |
| 20 |               | PTEN     | 44% | c.C284T        | p.P95L        | nonsynonymous SNV       | no  |
| 20 |               | SACS     | 5%  | c.G12346T      | p.D4116Y      | nonsynonymous SNV       | no  |
| 20 |               | ERCC4    | 49% | c.T2551G       | p.F851V       | nonsynonymous SNV       | no  |
| 20 |               | ERBB2    | 7%  | c.T2264C       | p.L755S       | nonsynonymous SNV       | yes |
| 20 |               | ARHGAP35 | ND  | c.T3284G       | p.V1095G      | nonsynonymous SNV       | no  |
| 20 |               | EP300    | 54% | c.A3377G       | p.N1126S      | nonsynonymous SNV       | no  |
| 20 |               | PIK3CA   | 14% | c.A3140G       | p.H1047R      | nonsynonymous SNV       | yes |
| 20 |               | SMO      | 42% | c.C2233A       | p.Q745K       | nonsynonymous SNV       | no  |
| 20 |               | FANCC    | 26% | c.G1378A       | p.G460S       | nonsynonymous SNV       | no  |
| 20 |               | NOTCH1   | 8%  | c.A5137G       | p.N1713D      | nonsynonymous SNV       | no  |
| 20 |               | MYCN     | 62% | c.473_512del   | p.158_171del  | frameshift deletion     | no  |
| 20 |               | GNAS     | 6%  | c.1113_1148del | p.371_383del  | nonframeshift deletion  | no  |
| 20 |               | MAP3K4   | 8%  | c.81_82insCCG  | p.P27delinsPP | nonframeshift insertion | no  |
| 21 | Primary Tumor | MUTYH    | 7%  | c.C1502T       | p.S501F       | nonsynonymous SNV       | no  |
| 21 |               | TSC2     | 40% | c.G4084T       | p.A1362S      | nonsynonymous SNV       | no  |
| 21 |               | MSH6     | 38% | c.G2501A       | p.S834N       | nonsynonymous SNV       | no  |

|    |               |        |     |                                                                  |                          |                         |     |
|----|---------------|--------|-----|------------------------------------------------------------------|--------------------------|-------------------------|-----|
| 21 |               | SLC4A5 | 40% | c.A2414G                                                         | p.H805R                  | nonsynonymous SNV       | no  |
| 21 |               | PIK3CA | 61% | c.G1633A                                                         | p.E545K                  | nonsynonymous SNV       | yes |
| 21 |               | B2M    | 39% | c.30_31del                                                       | p.10_11del               | frameshift deletion     | no  |
| 21 | Metastasis    | MUTYH  | 46% | c.C1502T                                                         | p.S501F                  | nonsynonymous SNV       | no  |
| 21 |               | TSC2   | 48% | c.G4084T                                                         | p.A1362S                 | nonsynonymous SNV       | no  |
| 21 |               | MSH6   | 5%  | c.G2501A                                                         | p.S834N                  | nonsynonymous SNV       | no  |
| 21 |               | SLC4A5 | 43% | c.A2414G                                                         | p.H805R                  | nonsynonymous SNV       | no  |
| 21 |               | PIK3CA | 40% | c.G1633A                                                         | p.E545K                  | nonsynonymous SNV       | yes |
| 22 | Primary Tumor | PIK3CD | 22% | c.C1439T                                                         | p.P480L                  | nonsynonymous SNV       | no  |
| 22 |               | SDHB   | 47% | c.T487C                                                          | p.S163P                  | nonsynonymous SNV       | no  |
| 22 |               | NTRK1  | 4%  | c.G2321A                                                         | p.R774Q                  | nonsynonymous SNV       | no  |
| 22 |               | AIP    | 3%  | c.G47A                                                           | p.R16H                   | nonsynonymous SNV       | no  |
| 22 |               | SLX4   | 3%  | c.G4034A                                                         | p.R1345H                 | nonsynonymous SNV       | no  |
| 22 |               | AXIN2  | 46% | c.G592C                                                          | p.E198Q                  | nonsynonymous SNV       | no  |
| 22 |               | AXIN2  | 38% | c.G386C                                                          | p.R129P                  | nonsynonymous SNV       | no  |
| 22 |               | AXIN2  | 41% | c.G357C                                                          | p.Q119H                  | nonsynonymous SNV       | no  |
| 22 |               | ASXL2  | 61% | c.A2200G                                                         | p.T734A                  | nonsynonymous SNV       | no  |
| 22 |               | TTL9   | 55% | c.T641C                                                          | p.I214T                  | nonsynonymous SNV       | no  |
| 22 |               | MYB    | 49% | c.T328C                                                          | p.Y110H                  | nonsynonymous SNV       | no  |
| 22 |               | GATA3  | 39% | c.1283_1284insCCTGT<br>CCTTTGGACCACAC<br>CACCCCTCCAGCATG<br>GTCA | p.S428fs                 | frameshift insertion    | no  |
| 22 |               | ZFH3   | 53% | c.3398_3399insCCCCC<br>CCCCCACC                                  | p.P1133delinsPP<br>PPPPP | nonframeshift insertion | no  |
| 22 |               | BARD1  | ND  | c.1075_1095del                                                   | p.359_365del             | nonframeshift deletion  | no  |
| 22 | Metastasis    | PIK3CD | 19% | c.C1439T                                                         | p.P480L                  | nonsynonymous SNV       | no  |
| 22 |               | SDHB   | 45% | c.T487C                                                          | p.S163P                  | nonsynonymous SNV       | no  |
| 22 |               | NTRK1  | 4%  | c.G2321A                                                         | p.R774Q                  | nonsynonymous SNV       | no  |
| 22 |               | AIP    | 4%  | c.G47A                                                           | p.R16H                   | nonsynonymous SNV       | no  |

|    |               |        |     |                                                                  |              |                        |     |
|----|---------------|--------|-----|------------------------------------------------------------------|--------------|------------------------|-----|
| 22 |               | SLX4   | 4%  | c.G4034A                                                         | p.R1345H     | nonsynonymous SNV      | no  |
| 22 |               | PPM1D  | 27% | c.C257A                                                          | p.P86Q       | nonsynonymous SNV      | no  |
| 22 |               | AXIN2  | 15% | c.G592C                                                          | p.E198Q      | nonsynonymous SNV      | no  |
| 22 |               | AXIN2  | 36% | c.G386C                                                          | p.R129P      | nonsynonymous SNV      | no  |
| 22 |               | AXIN2  | 60% | c.G357C                                                          | p.Q119H      | nonsynonymous SNV      | no  |
| 22 |               | ASXL2  | 42% | c.A2200G                                                         | p.T734A      | nonsynonymous SNV      | no  |
| 22 |               | TTL9   | 55% | c.T641C                                                          | p.I214T      | nonsynonymous SNV      | no  |
| 22 |               | MYB    | 14% | c.T328C                                                          | p.Y110H      | nonsynonymous SNV      | no  |
| 22 |               | RECQL4 | 60% | c.G2967T                                                         | p.M989I      | nonsynonymous SNV      | no  |
| 22 |               | GATA3  | 41% | c.1283_1284insCCTGT<br>CCTTTGGACCACAC<br>CACCCCTCCAGCATG<br>GTCA | p.S428fs     | frameshift insertion   | no  |
| 22 |               | BARD1  | 47% | c.1075_1095del                                                   | p.359_365del | nonframeshift deletion | no  |
| 23 | Primary Tumor | MUTYH  | 18% | c.C1502T                                                         | p.S501F      | nonsynonymous SNV      | no  |
| 23 |               | USH2A  | 48% | c.G1432C                                                         | p.E478Q      | nonsynonymous SNV      | no  |
| 23 |               | TP53   | 45% | c.C152G                                                          | p.S51X       | stopgain SNV           | yes |
| 23 |               | JAK3   | 91% | c.G2164A                                                         | p.V722I      | nonsynonymous SNV      | no  |
| 23 |               | ALK    | 76% | c.G1079A                                                         | p.R360K      | nonsynonymous SNV      | no  |
| 23 |               | MSH6   | 86% | c.C1508G                                                         | p.S503C      | nonsynonymous SNV      | no  |
| 23 |               | PIK3R1 | 8%  | c.G589C                                                          | p.D197H      | nonsynonymous SNV      | no  |
| 23 |               | TEK    | 86% | c.C2824T                                                         | p.L942F      | nonsynonymous SNV      | no  |
| 23 |               | PTEN   | 46% | c.591_593del                                                     | p.197_198del | nonframeshift deletion | no  |
| 23 | Metastasis    | MUTYH  | 44% | c.C1502T                                                         | p.S501F      | nonsynonymous SNV      | no  |
| 23 |               | USH2A  | 40% | c.G1432C                                                         | p.E478Q      | nonsynonymous SNV      | no  |
| 23 |               | TP53   | 35% | c.C152G                                                          | p.S51X       | stopgain SNV           | yes |
| 23 |               | JAK3   | 53% | c.G2164A                                                         | p.V722I      | nonsynonymous SNV      | no  |
| 23 |               | MSH6   | 4%  | c.C1508G                                                         | p.S503C      | nonsynonymous SNV      | no  |
| 23 |               | PIK3R1 | 8%  | c.G589C                                                          | p.D197H      | nonsynonymous SNV      | no  |

|    |               |        |     |                |              |                     |     |
|----|---------------|--------|-----|----------------|--------------|---------------------|-----|
| 23 |               | LTK    | 4%  | c.1210_1211del | p.404_404del | frameshift deletion | no  |
| 24 | Primary Tumor | PIK3CD | 52% | c.G1379A       | p.R460H      | nonsynonymous SNV   | no  |
| 24 |               | NTRK1  | 53% | c.G2321A       | p.R774Q      | nonsynonymous SNV   | no  |
| 24 |               | GATA3  | 27% | c.T881A        | p.M294K      | nonsynonymous SNV   | no  |
| 24 |               | ANK3   | 45% | c.G412A        | p.G138R      | nonsynonymous SNV   | no  |
| 24 |               | LTK    | 40% | c.G1054A       | p.V352I      | nonsynonymous SNV   | no  |
| 24 |               | MGA    | 21% | c.C7051G       | p.Q2351E     | nonsynonymous SNV   | no  |
| 24 |               | PALB2  | 29% | c.G2794A       | p.V932M      | nonsynonymous SNV   | no  |
| 24 |               | ERBB4  | 29% | c.G667A        | p.G223R      | nonsynonymous SNV   | no  |
| 24 |               | PIK3CA | 10% | c.G1633A       | p.E545K      | nonsynonymous SNV   | yes |
| 24 |               | MAP3K1 | 53% | c.C2243G       | p.S748X      | stopgain SNV        | no  |
| 24 |               | NOTCH4 | 40% | c.A1363G       | p.T455A      | nonsynonymous SNV   | no  |
| 24 |               | GPNMB  | 30% | c.C950A        | p.A317D      | nonsynonymous SNV   | no  |
| 24 |               | MLL3   | 9%  | c.A2922T       | p.L974F      | nonsynonymous SNV   | no  |
| 24 |               | MAP3K1 | 50% | c.1138_1145del | p.380_382del | frameshift deletion | no  |
| 24 | Metastasis    | PIK3CD | 56% | c.G1379A       | p.R460H      | nonsynonymous SNV   | no  |
| 24 |               | NTRK1  | 17% | c.G2321A       | p.R774Q      | nonsynonymous SNV   | no  |
| 24 |               | GATA3  | 49% | c.T881A        | p.M294K      | nonsynonymous SNV   | no  |
| 24 |               | ANK3   | 38% | c.G412A        | p.G138R      | nonsynonymous SNV   | no  |
| 24 |               | LTK    | 26% | c.G1054A       | p.V352I      | nonsynonymous SNV   | no  |
| 24 |               | MGA    | 44% | c.C7051G       | p.Q2351E     | nonsynonymous SNV   | no  |
| 24 |               | PALB2  | 24% | c.G2794A       | p.V932M      | nonsynonymous SNV   | no  |
| 24 |               | MUC16  | 39% | c.A19771G      | p.N6591D     | nonsynonymous SNV   | no  |
| 24 |               | ERBB4  | 38% | c.C3536G       | p.P1179R     | nonsynonymous SNV   | no  |
| 24 |               | ERBB4  | 13% | c.G667A        | p.G223R      | nonsynonymous SNV   | no  |
| 24 |               | PIK3CA | 42% | c.G1633A       | p.E545K      | nonsynonymous SNV   | yes |
| 24 |               | MAP3K1 | 54% | c.C2243G       | p.S748X      | stopgain SNV        | no  |

|    |               |        |     |                |              |                        |    |
|----|---------------|--------|-----|----------------|--------------|------------------------|----|
| 24 |               | NOTCH4 | 28% | c.A1363G       | p.T455A      | nonsynonymous SNV      | no |
| 24 |               | GPNMB  | 30% | c.C950A        | p.A317D      | nonsynonymous SNV      | no |
| 24 |               | MLL3   | 25% | c.A2922T       | p.L974F      | nonsynonymous SNV      | no |
| 24 |               | MAP3K1 | 42% | c.1138_1145del | p.380_382del | frameshift deletion    | no |
| 26 | Primary Tumor | TP53   | 56% | c.A466C        | p.N156H      | nonsynonymous SNV      | no |
| 26 |               | ERCC2  | 50% | c.C874G        | p.Q292E      | nonsynonymous SNV      | no |
| 26 |               | ITGAV  | 31% | c.C2074T       | p.R692C      | nonsynonymous SNV      | no |
| 26 |               | ROS1   | 47% | c.G6607A       | p.D2203N     | nonsynonymous SNV      | no |
| 26 |               | FANCB  | 47% | c.C1177T       | p.P393S      | nonsynonymous SNV      | no |
| 26 |               | PALB2  | 16% | c.1882_1890del | p.628_630del | nonframeshift deletion | no |
| 26 |               | TP53   | 16% | c.484delG      | p.E162fs     | frameshift deletion    | no |
| 26 | Metastasis    | ERCC2  | 48% | c.C874G        | p.Q292E      | nonsynonymous SNV      | no |
| 26 |               | ITGAV  | 21% | c.C2074T       | p.R692C      | nonsynonymous SNV      | no |
| 26 |               | ROS1   | 49% | c.G6607A       | p.D2203N     | nonsynonymous SNV      | no |
|    |               | PALB2  | 41% | c.1882_1890del | p.628_630del | nonframeshift deletion | no |





|    |                       |                                                        |                       |                                                        |            |                                                        |            |                                                        |            |                                                        |
|----|-----------------------|--------------------------------------------------------|-----------------------|--------------------------------------------------------|------------|--------------------------------------------------------|------------|--------------------------------------------------------|------------|--------------------------------------------------------|
| 12 | everolimus            | <i>PIK3CA</i> , NM_006218:c. G1624A:p.E542K (Hotspot)  | everolimus            | <i>PIK3CA</i> , NM_006218:c. G1624A:p.E542K (Hotspot)  | everolimus | <i>PIK3CA</i> , NM_006218:c. G1624A:p.E542K (Hotspot)  | everolimus | <i>PIK3CA</i> , NM_006218:c. G1624A:p.E542K (Hotspot)  | everolimus | <i>PIK3CA</i> , NM_006218:c. G1624A:p.E542K (Hotspot)  |
| 13 | everolimus            | <i>PIK3CA</i> , NM_006218:c. A3140G:p.H1047R (Hotspot) | everolimus            | <i>PIK3CA</i> , NM_006218:c. A3140G:p.H1047R (Hotspot) | everolimus | <i>PIK3CA</i> , NM_006218:c. A3140G:p.H1047R (Hotspot) | everolimus | <i>PIK3CA</i> , NM_006218:c. A3140G:p.H1047R (Hotspot) | everolimus | <i>PIK3CA</i> , NM_006218:c. A3140G:p.H1047R (Hotspot) |
| 14 | ---                   | ---                                                    | ---                   | ---                                                    | ---        | ---                                                    | ---        | ---                                                    | ---        | ---                                                    |
| 15 | ---                   | ---                                                    | ---                   | ---                                                    | ---        | ---                                                    | ---        | ---                                                    | ---        | ---                                                    |
| 16 | everolimus            | <i>PIK3CA</i> , NM_006218:c. C1616G:p.P539R (Hotspot)  | everolimus            | <i>PIK3CA</i> , NM_006218:c. C1616G:p.P539R (Hotspot)  | everolimus | <i>PIK3CA</i> , NM_006218:c. C1616G:p.P539R (Hotspot)  | everolimus | <i>PIK3CA</i> , NM_006218:c. C1616G:p.P539R (Hotspot)  | everolimus | <i>PIK3CA</i> , NM_006218:c. C1616G:p.P539R (Hotspot)  |
| 17 | everolimus            | <i>AKT1</i> , NM_001014431:c. G49A:p.E17K (Hotspot)    | everolimus            | <i>AKT1</i> , NM_001014431:c. G49A:p.E17K (Hotspot)    | everolimus | <i>AKT1</i> , NM_001014431:c. G49A:p.E17K (Hotspot)    | everolimus | <i>AKT1</i> , NM_001014431:c. G49A:p.E17K (Hotspot)    | everolimus | <i>AKT1</i> , NM_001014431:c. G49A:p.E17K (Hotspot)    |
| 18 | everolimus            | <i>PIK3CA</i> , NM_006218:c. A3140T:p.H1047L (Hotspot) | everolimus            | <i>PIK3CA</i> , NM_006218:c. A3140T:p.H1047L (Hotspot) | everolimus | <i>PIK3CA</i> , NM_006218:c. A3140T:p.H1047L (Hotspot) | everolimus | <i>PIK3CA</i> , NM_006218:c. A3140T:p.H1047L (Hotspot) | everolimus | <i>PIK3CA</i> , NM_006218:c. A3140T:p.H1047L (Hotspot) |
| 20 | everolimus            | <i>PIK3CA</i> , NM_006218:c. A3140T:p.H1047L (Hotspot) | everolimus            | <i>PIK3CA</i> , NM_006218:c. A3140T:p.H1047L (Hotspot) | everolimus | <i>PIK3CA</i> , NM_006218:c. A3140T:p.H1047L (Hotspot) | everolimus | <i>PIK3CA</i> , NM_006218:c. A3140T:p.H1047L (Hotspot) | everolimus | <i>PIK3CA</i> , NM_006218:c. A3140T:p.H1047L (Hotspot) |
| 21 | everolimus            | <i>PIK3CA</i> , NM_006218:c. G1633A:p.E545K (Hotspot)  | everolimus            | <i>PIK3CA</i> , NM_006218:c. G1633A:p.E545K (Hotspot)  | everolimus | <i>PIK3CA</i> , NM_006218:c. G1633A:p.E545K (Hotspot)  | everolimus | <i>PIK3CA</i> , NM_006218:c. G1633A:p.E545K (Hotspot)  | everolimus | <i>PIK3CA</i> , NM_006218:c. G1633A:p.E545K (Hotspot)  |
| 22 | ---                   | ---                                                    | ---                   | ---                                                    | ---        | ---                                                    | ---        | ---                                                    | ---        | ---                                                    |
| 23 | ---                   | ---                                                    | ---                   | ---                                                    | ---        | ---                                                    | ---        | ---                                                    | ---        | ---                                                    |
| 24 | everolimus            | <i>PIK3CA</i> , NM_006218:c. G1633A:p.E545K (Hotspot)  | everolimus            | <i>PIK3CA</i> , NM_006218:c. G1633A:p.E545K (Hotspot)  | everolimus | <i>PIK3CA</i> , NM_006218:c. G1633A:p.E545K (Hotspot)  | everolimus | <i>PIK3CA</i> , NM_006218:c. G1633A:p.E545K (Hotspot)  | everolimus | <i>PIK3CA</i> , NM_006218:c. G1633A:p.E545K (Hotspot)  |
| 26 | lapatinib+trastuzumab | <i>ERBB2</i> , focal amplification                     | lapatinib+trastuzumab | <i>ERBB2</i> , focal amplification                     | lapatinib  | <i>ERBB2</i> , focal amplification                     | lapatinib  | <i>ERBB2</i> , focal amplification                     | lapatinib  | <i>ERBB2</i> , focal amplification                     |

**Supplementary Table S4: List of 365 genes assessed by targeted NGS**

| Symbol          | Name                                                                    | Chromosomal location | Entrez Gene ID |
|-----------------|-------------------------------------------------------------------------|----------------------|----------------|
| <i>ABL1</i>     | c-abl oncogene 1, non-receptor tyrosine kinase                          | 9q34.1               | 25             |
| <i>ABL2</i>     | v-abl Abelson murine leukemia viral oncogene homolog 2                  | 1q25.2               | 27             |
| <i>ACVR1B</i>   | activin A receptor, type IB                                             | 12q13                | 91             |
| <i>ADNP</i>     | activity-dependent neuroprotector homeobox                              | 20q13.13             | 23394          |
| <i>AFF2</i>     | AF4/FMR2 family, member 2                                               | Xq28                 | 2334           |
| <i>AIP</i>      | aryl hydrocarbon receptor interacting protein                           | 11q13.3              | 9049           |
| <i>AJUBA</i>    | ajuba LIM protein                                                       | 14q11.2              | 84962          |
| <i>AKT1</i>     | v-akt murine thymoma viral oncogene homolog 1                           | 14q32.32             | 207            |
| <i>AKT2</i>     | v-akt murine thymoma viral oncogene homolog 2                           | 19q13.1-q13.2        | 208            |
| <i>AKT3</i>     | v-akt murine thymoma viral oncogene homolog 3 (protein kinase B, gamma) | 1q44                 | 10000          |
| <i>ALK</i>      | anaplastic lymphoma receptor tyrosine kinase                            | 2p23                 | 238            |
| <i>ALKBH6</i>   | alkB, alkylation repair homolog 6 (E. coli)                             | 19q13.12             | 84964          |
| <i>ANGPT2</i>   | angiopoietin 2                                                          | 8p23.1               | 285            |
| <i>ANK3</i>     | ankyrin 3, node of Ranvier (ankyrin G)                                  | 10q21                | 288            |
| <i>APC</i>      | adenomatous polyposis coli                                              | 5q21-q22             | 324            |
| <i>APOB</i>     | apolipoprotein B (including Ag(x) antigen)                              | 2p24-p23             | 338            |
| <i>AR</i>       | androgen receptor                                                       | Xq12                 | 367            |
| <i>ARHGAP35</i> | Rho GTPase activating protein 35                                        | 19q13.3              | 2909           |
| <i>ARID1A</i>   | AT rich interactive domain 1A (SWI-like)                                | 1p35.3               | 8289           |
| <i>ARID1B</i>   | AT rich interactive domain 1B (SWI1-like)                               | 6q25.1               | 57492          |
| <i>ARID2</i>    | AT rich interactive domain 2 (ARID, RFX-like)                           | 12q12                | 196528         |
| <i>ARID5B</i>   | AT rich interactive domain 5B (MRF1-like)                               | 10q21.2              | 84159          |
| <i>ASXL2</i>    | additional sex combs like 2 (Drosophila)                                | 2p24.1               | 55252          |
| <i>ATM</i>      | ataxia telangiectasia mutated                                           | 11q22-q23            | 472            |
| <i>ATRX</i>     | alpha thalassemia/mental retardation syndrome X-linked                  | Xq21.1               | 546            |
| <i>AXIN2</i>    | axin 2                                                                  | 17q23-q24            | 8313           |
| <i>AXL</i>      | AXL receptor tyrosine kinase                                            | 19q13.1              | 558            |
| <i>B2M</i>      | beta-2-microglobulin                                                    | 15q21-q22.2          | 567            |
| <i>BAP1</i>     | BRCA1 associated protein-1 (ubiquitin carboxy-terminal hydrolase)       | 3p21.31-p21.2        | 8314           |
| <i>BARD1</i>    | BRCA1 associated RING domain 1                                          | 2q34-q35             | 580            |
| <i>BCLAF1</i>   | BCL2-associated transcription factor 1                                  | 6q22-q23             | 9774           |
| <i>BCOR</i>     | BCL6 corepressor                                                        | Xp11.4               | 54880          |
| <i>BLK</i>      | B lymphoid tyrosine kinase                                              | 8p23-p22             | 640            |
| <i>BLM</i>      | Bloom syndrome, RecQ helicase-like                                      | 15q26.1              | 641            |
| <i>BMPRIA</i>   | bone morphogenetic protein receptor, type IA                            | 10q22.3              | 657            |

|                |                                                                                                    |             |        |
|----------------|----------------------------------------------------------------------------------------------------|-------------|--------|
| <i>BRAF</i>    | v-raf murine sarcoma viral oncogene homolog B1                                                     | 7q34        | 673    |
| <i>BRCA1</i>   | breast cancer 1, early onset                                                                       | 17q21       | 672    |
| <i>BRCA2</i>   | breast cancer 2, early onset                                                                       | 13q12.3     | 675    |
| <i>BRIP1</i>   | BRCA1 interacting protein C-terminal helicase 1                                                    | 17q22.2     | 83990  |
| <i>BUB1B</i>   | budding uninhibited by benzimidazoles 1 homolog beta (yeast)                                       | 15q15       | 701    |
| <i>C3ORF70</i> | chromosome 3 open reading frame 70                                                                 | 3q27.2      | 285382 |
| <i>CAP2</i>    | CAP, adenylate cyclase-associated protein, 2 (yeast)                                               | 6p22.3      | 10486  |
| <i>CASP8</i>   | caspase 8, apoptosis-related cysteine peptidase                                                    | 2q33-q34    | 841    |
| <i>CBFB</i>    | core-binding factor, beta subunit                                                                  | 16q22.1     | 865    |
| <i>CCDC6</i>   | coiled-coil domain containing 6                                                                    | 10q21       | 8030   |
| <i>CCL2</i>    | chemokine (C-C motif) ligand 2                                                                     | 17q11.2-q12 | 6347   |
| <i>CCND1</i>   | cyclin D1                                                                                          | 11q13       | 595    |
| <i>CCND3</i>   | cyclin D3                                                                                          | 6p21        | 896    |
| <i>CCR4</i>    | chemokine (C-C motif) receptor 4                                                                   | 3p24        | 1233   |
| <i>CD22</i>    | CD22 molecule                                                                                      | 19q13.1     | 933    |
| <i>CD248</i>   | CD248 molecule, endosialin                                                                         | 11q13       | 57124  |
| <i>CD33</i>    | CD33 molecule                                                                                      | 19q13.3     | 945    |
| <i>CD38</i>    | CD38 molecule                                                                                      | 4p15        | 952    |
| <i>CD3E</i>    | CD3e molecule, epsilon (CD3-TCR complex)                                                           | 11q23       | 916    |
| <i>CD3G</i>    | CD3g molecule, gamma (CD3-TCR complex)                                                             | 11q23       | 917    |
| <i>CD4</i>     | CD4 molecule                                                                                       | 12p13.31    | 920    |
| <i>CD40</i>    | CD40 molecule, TNF receptor superfamily member 5                                                   | 20q12-q13.2 | 958    |
| <i>CD52</i>    | CD52 molecule                                                                                      | 1p36        | 1043   |
| <i>CD70</i>    | CD70 molecule                                                                                      | 19p13       | 970    |
| <i>CD74</i>    | CD74 molecule, major histocompatibility complex, class II invariant chain                          | 5q32        | 972    |
| <i>CDC27</i>   | cell division cycle 27 homolog ( <i>S. cerevisiae</i> )                                            | 17q21.32    | 996    |
| <i>CDC73</i>   | cell division cycle 73, Paf1/RNA polymerase II complex component, homolog ( <i>S. cerevisiae</i> ) | 1q25        | 79577  |
| <i>CDH1</i>    | cadherin 1, type 1, E-cadherin (epithelial)                                                        | 16q22.1     | 999    |
| <i>CDK4</i>    | cyclin-dependent kinase 4                                                                          | 12q14       | 1019   |
| <i>CDKN1B</i>  | cyclin-dependent kinase inhibitor 1B (p27, Kip1)                                                   | 12p13.1-p12 | 1027   |
| <i>CDKN1C</i>  | cyclin-dependent kinase inhibitor 1C (p57, Kip2)                                                   | 11p15.5     | 1028   |
| <i>CDKN2A</i>  | cyclin-dependent kinase inhibitor 2A                                                               | 9p21        | 1029   |
| <i>CDKN2B</i>  | cyclin-dependent kinase inhibitor 2B (p15, inhibits CDK4)                                          | 9p21        | 1030   |
| <i>CEBPA</i>   | CCAAT/enhancer binding protein (C/EBP), alpha                                                      | 19q13.1     | 1050   |
| <i>CEP57</i>   | centrosomal protein 57kDa                                                                          | 11q21       | 9702   |
| <i>CHD4</i>    | chromodomain helicase DNA binding protein 4                                                        | 12p13       | 1108   |

|               |                                                                                                                |             |        |
|---------------|----------------------------------------------------------------------------------------------------------------|-------------|--------|
| <i>CHEK2</i>  | checkpoint kinase 2                                                                                            | 22q12.1     | 11200  |
| <i>CREBBP</i> | CREB binding protein                                                                                           | 16p13.3     | 1387   |
| <i>CSF1R</i>  | colony stimulating factor 1 receptor                                                                           | 5q32        | 1436   |
| <i>CTCF</i>   | CCCTC-binding factor (zinc finger protein)                                                                     | 16q21-q22.3 | 10664  |
| <i>CTGF</i>   | connective tissue growth factor                                                                                | 6q23.1      | 1490   |
| <i>CTLA4</i>  | cytotoxic T-lymphocyte-associated protein 4                                                                    | 2q33        | 1493   |
| <i>CTNNB1</i> | catenin (cadherin-associated protein), beta 1, 88kDa                                                           | 3p21        | 1499   |
| <i>CUL3</i>   | cullin 3                                                                                                       | 2q36.2      | 8452   |
| <i>CUX1</i>   | cut-like homeobox 1                                                                                            | 7q22.1      | 1523   |
| <i>CYLD</i>   | cylindromatosis (turban tumor syndrome)                                                                        | 16q12.1     | 1540   |
| <i>DDB2</i>   | damage-specific DNA binding protein 2, 48kDa                                                                   | 11p12-p11   | 1643   |
| <i>DDR1</i>   | discoidin domain receptor tyrosine kinase 1                                                                    | 6p21.3      | 780    |
| <i>DDR2</i>   | discoidin domain receptor tyrosine kinase 2                                                                    | 1q23.3      | 4921   |
| <i>DIAPH1</i> | diaphanous homolog 1 (Drosophila)                                                                              | 5q31        | 1729   |
| <i>DICER1</i> | dicer 1, ribonuclease type III                                                                                 | 14q32.13    | 23405  |
| <i>DIS3L2</i> | DIS3 mitotic control homolog (S. cerevisiae)-like 2                                                            | 2q37.1      | 129563 |
| <i>DLL4</i>   | delta-like 4 (Drosophila)                                                                                      | 15q14       | 54567  |
| <i>DNER</i>   | delta/notch-like EGF repeat containing                                                                         | 2q36.3      | 92737  |
| <i>EGFL7</i>  | EGF-like-domain, multiple 7                                                                                    | 9q34.3      | 51162  |
| <i>EGFR</i>   | epidermal growth factor receptor                                                                               | 7p12        | 1956   |
| <i>EIF2S2</i> | eukaryotic translation initiation factor 2, subunit 2 beta, 38kDa                                              | 20q11.2     | 8894   |
| <i>ELF3</i>   | E74-like factor 3 (ets domain transcription factor, epithelial-specific )                                      | 1q32.2      | 1999   |
| <i>EP300</i>  | E1A binding protein p300                                                                                       | 22q13.2     | 2033   |
| <i>EPCAM</i>  | epithelial cell adhesion molecule                                                                              | 2p21        | 4072   |
| <i>EPHA2</i>  | EPH receptor A2                                                                                                | 1p36        | 1969   |
| <i>EPHB2</i>  | EPH receptor B2                                                                                                | 1p36.1-p35  | 2048   |
| <i>ERBB2</i>  | v-erb-b2 erythroblastic leukemia viral oncogene homolog 2, neuro/glioblastoma derived oncogene homolog (avian) | 17q21.1     | 2064   |
| <i>ERBB3</i>  | v-erb-b2 erythroblastic leukemia viral oncogene homolog 3 (avian)                                              | 12q13       | 2065   |
| <i>ERBB4</i>  | v-erb-a erythroblastic leukemia viral oncogene homolog 4 (avian)                                               | 2q33.3-q34  | 2066   |
| <i>ERCC2</i>  | excision repair cross-complementing rodent repair deficiency, complementation group 2                          | 19q13.3     | 2068   |
| <i>ERCC3</i>  | excision repair cross-complementing rodent repair deficiency, complementation group 3                          | 2q21        | 2071   |
| <i>ERCC4</i>  | excision repair cross-complementing rodent repair deficiency, complementation group 4                          | 16p13.12    | 2072   |

|                |                                                                                                          |              |        |
|----------------|----------------------------------------------------------------------------------------------------------|--------------|--------|
| <i>ERCC5</i>   | excision repair cross-complementing rodent repair deficiency, complementation group 5                    | 13q33        | 2073   |
| <i>ESR1</i>    | estrogen receptor 1                                                                                      | 6q25.1       | 2099   |
| <i>EXT1</i>    | exostosin 1                                                                                              | 8q24.11      | 2131   |
| <i>EXT2</i>    | exostosin 2                                                                                              | 11p12-p11    | 2132   |
| <i>EZH2</i>    | enhancer of zeste homolog 2 (Drosophila)                                                                 | 7q35-q36     | 2146   |
| <i>EZR</i>     | ezrin                                                                                                    | 6q25.3       | 7430   |
| <i>FAM123B</i> | family with sequence similarity 123B                                                                     | Xq11.2       | 139285 |
| <i>FANCA</i>   | Fanconi anemia, complementation group A                                                                  | 16q24.3      | 2175   |
| <i>FANCB</i>   | Fanconi anemia, complementation group B                                                                  | Xp22.2       | 2187   |
| <i>FANCC</i>   | Fanconi anemia, complementation group C                                                                  | 9q22.3       | 2176   |
| <i>FANCD2</i>  | Fanconi anemia, complementation group D2                                                                 | 3p26         | 2177   |
| <i>FANCE</i>   | Fanconi anemia, complementation group E                                                                  | 6p22-p21     | 2178   |
| <i>FANCF</i>   | Fanconi anemia, complementation group F                                                                  | 11p15        | 2188   |
| <i>FANCG</i>   | Fanconi anemia, complementation group G                                                                  | 9p13         | 2189   |
| <i>FANCI</i>   | Fanconi anemia, complementation group I                                                                  | 15q26.1      | 55215  |
| <i>FANCL</i>   | Fanconi anemia, complementation group L                                                                  | 2p16.1       | 55120  |
| <i>FANCM</i>   | Fanconi anemia, complementation group M                                                                  | 14q21.2      | 57697  |
| <i>FAT1</i>    | FAT tumor suppressor homolog 1 (Drosophila)                                                              | 4q35         | 2195   |
| <i>FBXW7</i>   | F-box and WD repeat domain containing 7, E3 ubiquitin protein ligase                                     | 4q31.3       | 55294  |
| <i>FES</i>     | feline sarcoma oncogene                                                                                  | 15q26.1      | 2242   |
| <i>FGFR1</i>   | fibroblast growth factor receptor 1                                                                      | 8p12         | 2260   |
| <i>FGFR2</i>   | fibroblast growth factor receptor 2                                                                      | 10q26        | 2263   |
| <i>FGFR3</i>   | fibroblast growth factor receptor 3                                                                      | 4p16.3       | 2261   |
| <i>FGFR4</i>   | fibroblast growth factor receptor 4                                                                      | 5q35.1-qter  | 2264   |
| <i>FGR</i>     | Gardner-Rasheed feline sarcoma viral (v-fgr) oncogene homolog                                            | 1p36.2-p36.1 | 2268   |
| <i>FH</i>      | fumarate hydratase                                                                                       | 1q42.1       | 2271   |
| <i>FLCN</i>    | folliculin                                                                                               | 17p11.2      | 201163 |
| <i>FLT1</i>    | fms-related tyrosine kinase 1 (vascular endothelial growth factor/vascular permeability factor receptor) | 13q12        | 2321   |
| <i>FLT3</i>    | fms-related tyrosine kinase 3                                                                            | 13q12        | 2322   |
| <i>FLT4</i>    | fms-related tyrosine kinase 4                                                                            | 5q35.3       | 2324   |
| <i>FNTA</i>    | farnesyltransferase, CAAX box, alpha                                                                     | 8p11         | 2339   |
| <i>FOXA1</i>   | forkhead box A1                                                                                          | 14q12-q13    | 3169   |
| <i>FOXQ1</i>   | forkhead box Q1                                                                                          | 6p25         | 94234  |
| <i>FRK</i>     | fyn-related kinase                                                                                       | 6q21-q22.3   | 2444   |
| <i>FUBP1</i>   | far upstream element (FUSE) binding protein 1                                                            | 1p31.1       | 8880   |
| <i>FYN</i>     | FYN oncogene related to SRC, FGR, YES                                                                    | 6q21         | 2534   |

|                 |                                                                                                           |               |       |
|-----------------|-----------------------------------------------------------------------------------------------------------|---------------|-------|
| <i>FZD7</i>     | frizzled family receptor 7                                                                                | 2q33          | 8324  |
| <i>GATA2</i>    | GATA binding protein 2                                                                                    | 3q21.3        | 2624  |
| <i>GATA3</i>    | GATA binding protein 3                                                                                    | 10p15         | 2625  |
| <i>GNAS</i>     | GNAS complex locus                                                                                        | 20q13.3       | 2778  |
| <i>GNPTAB</i>   | N-acetylglucosamine-1-phosphate transferase, alpha and beta subunits                                      | 12q23.2       | 79158 |
| <i>GOT1</i>     | glutamic-oxaloacetic transaminase 1, soluble (aspartate aminotransferase 1)                               | 10q24.1-q25.1 | 2805  |
| <i>GPC3</i>     | glypican 3                                                                                                | Xq26.1        | 2719  |
| <i>GPNMB</i>    | glycoprotein (transmembrane) nmb                                                                          | 7p15          | 10457 |
| <i>HCK</i>      | hemopoietic cell kinase                                                                                   | 20q11-q12     | 3055  |
| <i>HGF</i>      | hepatocyte growth factor (hepapoietin A; scatter factor)                                                  | 7q21.1        | 3082  |
| <i>HLA-A</i>    | major histocompatibility complex, class I, A                                                              | 6p21.3        | 3105  |
| <i>HLA-B</i>    | major histocompatibility complex, class I, B                                                              | 6p21.3        | 3106  |
| <i>HLA-DRB5</i> | major histocompatibility complex, class II, DR beta 5                                                     | 6p21.3        | 3127  |
| <i>HNF1A</i>    | HNF1 homeobox A                                                                                           | 12q24.2       | 6927  |
| <i>HRAS</i>     | v-Ha-ras Harvey rat sarcoma viral oncogene homolog                                                        | 11p15.5       | 3265  |
| <i>ICAM1</i>    | intercellular adhesion molecule 1                                                                         | 19p13.3-p13.2 | 3383  |
| <i>IDH1</i>     | isocitrate dehydrogenase 1 (NADP+), soluble                                                               | 2q33.3        | 3417  |
| <i>IDH2</i>     | isocitrate dehydrogenase 2 (NADP+), mitochondrial                                                         | 15q26.1       | 3418  |
| <i>IGF1R</i>    | insulin-like growth factor 1 receptor                                                                     | 15q26.3       | 3480  |
| <i>IL12A</i>    | interleukin 12A (natural killer cell stimulatory factor 1, cytotoxic lymphocyte maturation factor 1, p35) | 3q25.33-q26   | 3592  |
| <i>IL12B</i>    | interleukin 12B (natural killer cell stimulatory factor 2, cytotoxic lymphocyte maturation factor 2, p40) | 5q31.1-q33.1  | 3593  |
| <i>IL1B</i>     | interleukin 1, beta                                                                                       | 2q14          | 3553  |
| <i>IL23A</i>    | interleukin 23, alpha subunit p19                                                                         | 12q13.3       | 51561 |
| <i>IL2RA</i>    | interleukin 2 receptor, alpha                                                                             | 10p15-p14     | 3559  |
| <i>IL2RB</i>    | interleukin 2 receptor, beta                                                                              | 22q13.1       | 3560  |
| <i>IL6R</i>     | interleukin 6 receptor                                                                                    | 1q21          | 3570  |
| <i>ING1</i>     | inhibitor of growth family, member 1                                                                      | 13q34         | 3621  |
| <i>INPPL1</i>   | inositol polyphosphate phosphatase-like 1                                                                 | 11q13         | 3636  |
| <i>IPO7</i>     | importin 7                                                                                                | 11p15.4       | 10527 |
| <i>IRF6</i>     | interferon regulatory factor 6                                                                            | 1q32.3-q41    | 3664  |
| <i>ITGA4</i>    | integrin, alpha 4 (antigen CD49D, alpha 4 subunit of VLA-4 receptor)                                      | 2q31.3        | 3676  |
| <i>ITGAL</i>    | integrin, alpha L (antigen CD11A (p180), lymphocyte function-associated antigen 1; alpha polypeptide)     | 16p11.2       | 3683  |
| <i>ITGAV</i>    | integrin, alpha V                                                                                         | 2q31-q32      | 3685  |
| <i>JAK1</i>     | Janus kinase 1                                                                                            | 1p32.3-p31.3  | 3716  |
| <i>JAK2</i>     | Janus kinase 2                                                                                            | 9p24          | 3717  |

|                |                                                                                                |                |       |
|----------------|------------------------------------------------------------------------------------------------|----------------|-------|
| <i>JAK3</i>    | Janus kinase 3                                                                                 | 19p13.1        | 3718  |
| <i>KDM6A</i>   | lysine (K)-specific demethylase 6A                                                             | Xp11.2         | 7403  |
| <i>KDR</i>     | kinase insert domain receptor (a type III receptor tyrosine kinase)                            | 4q11-q12       | 3791  |
| <i>KEAP1</i>   | kelch-like ECH-associated protein 1                                                            | 19p13.2        | 9817  |
| <i>KIT</i>     | v-kit Hardy-Zuckerman 4 feline sarcoma viral oncogene homolog                                  | 4q11-q12       | 3815  |
| <i>KLHL8</i>   | kelch-like 8 (Drosophila)                                                                      | 4q22.1         | 57563 |
| <i>KRAS</i>    | v-Ki-ras2 Kirsten rat sarcoma viral oncogene homolog                                           | 12p12.1        | 3845  |
| <i>L3MBTL4</i> | l(3)mbt-like 4 (Drosophila)                                                                    | 18p11.31       | 91133 |
| <i>LCK</i>     | lymphocyte-specific protein tyrosine kinase                                                    | 1p34.3         | 3932  |
| <i>LCPI</i>    | lymphocyte cytosolic protein 1 (L-plastin)                                                     | 13q14.3        | 3936  |
| <i>LTK</i>     | leukocyte receptor tyrosine kinase                                                             | 15q15.1-q21.1  | 4058  |
| <i>LYN</i>     | v-yes-1 Yamaguchi sarcoma viral related oncogene homolog                                       | 8q13           | 4067  |
| <i>MAP2K1</i>  | mitogen-activated protein kinase kinase 1                                                      | 15q22.1-q22.33 | 5604  |
| <i>MAP2K4</i>  | mitogen-activated protein kinase kinase 4                                                      | 17p12          | 6416  |
| <i>MAP3K1</i>  | mitogen-activated protein kinase kinase kinase 1, E3 ubiquitin protein ligase                  | 5q11.2         | 4214  |
| <i>MAP3K10</i> | mitogen-activated protein kinase kinase kinase 10                                              | 19q13.2        | 4294  |
| <i>MAP3K13</i> | mitogen-activated protein kinase kinase kinase 13                                              | 3q27           | 9175  |
| <i>MAP3K4</i>  | mitogen-activated protein kinase kinase kinase 4                                               | 6q26           | 4216  |
| <i>MAP4K3</i>  | mitogen-activated protein kinase kinase kinase kinase 3                                        | 2p22.1         | 8491  |
| <i>MAPK1</i>   | mitogen-activated protein kinase 1                                                             | 22q11.21       | 5594  |
| <i>MAX</i>     | MYC associated factor X                                                                        | 14q23          | 4149  |
| <i>MBD1</i>    | methyl-CpG binding domain protein 1                                                            | 18q21          | 4152  |
| <i>MBTPS1</i>  | membrane-bound transcription factor peptidase, site 1                                          | 16q24          | 8720  |
| <i>MEN1</i>    | multiple endocrine neoplasia I                                                                 | 11q13          | 4221  |
| <i>MET</i>     | met proto-oncogene (hepatocyte growth factor receptor)                                         | 7q31           | 4233  |
| <i>MGA</i>     | MAX gene associated                                                                            | 15q14          | 23269 |
| <i>MICALCL</i> | MICAL C-terminal like                                                                          | 11p15.3        | 84953 |
| <i>MLH1</i>    | mutL homolog 1, colon cancer, nonpolyposis type 2 (E. coli)                                    | 3p21.3         | 4292  |
| <i>MLL</i>     | myeloid/lymphoid or mixed-lineage leukemia (trithorax homolog, Drosophila)                     | 11q23          | 4297  |
| <i>MLL2</i>    | myeloid/lymphoid or mixed-lineage leukemia 2                                                   | 12q13.12       | 8085  |
| <i>MLL3</i>    | myeloid/lymphoid or mixed-lineage leukemia 3                                                   | 7q36.1         | 58508 |
| <i>MLLT4</i>   | myeloid/lymphoid or mixed-lineage leukemia (trithorax homolog, Drosophila); translocated to, 4 | 6q27           | 4301  |
| <i>MORC4</i>   | MORC family CW-type zinc finger 4                                                              | Xq22.3         | 79710 |
| <i>MS4A1</i>   | membrane-spanning 4-domains, subfamily A, member 1                                             | 11q12          | 931   |

|               |                                                                              |               |        |
|---------------|------------------------------------------------------------------------------|---------------|--------|
| <i>MSH2</i>   | mutS homolog 2, colon cancer, nonpolyposis type 1 (E. coli)                  | 2p21          | 4436   |
| <i>MSH6</i>   | mutS homolog 6 (E. coli)                                                     | 2p16          | 2956   |
| <i>MSLN</i>   | mesothelin                                                                   | 16p13.3       | 10232  |
| <i>MST1R</i>  | macrophage stimulating 1 receptor (c-met-related tyrosine kinase)            | 3p21.3        | 4486   |
| <i>MTOR</i>   | mechanistic target of rapamycin (serine/threonine kinase)                    | 1p36.2        | 2475   |
| <i>MUC1</i>   | mucin 1, cell surface associated                                             | 1q21          | 4582   |
| <i>MUC16</i>  | mucin 16, cell surface associated                                            | 19p13.2       | 94025  |
| <i>MUTYH</i>  | mutY homolog (E. coli)                                                       | 1p34.1        | 4595   |
| <i>MYB</i>    | v-myb myeloblastosis viral oncogene homolog (avian)                          | 6q22-q23      | 4602   |
| <i>MYCN</i>   | v-myc myelocytomatosis viral related oncogene, neuroblastoma derived (avian) | 2p24.3        | 4613   |
| <i>MYH9</i>   | myosin, heavy chain 9, non-muscle                                            | 22q13.1       | 4627   |
| <i>NBN</i>    | nibrin                                                                       | 8q21          | 4683   |
| <i>NBPF1</i>  | neuroblastoma breakpoint family, member 1                                    | 1p36.13       | 55672  |
| <i>NCAM1</i>  | neural cell adhesion molecule 1                                              | 11q23.1       | 4684   |
| <i>NCOR1</i>  | nuclear receptor corepressor 1                                               | 17p11.2       | 9611   |
| <i>NCOR2</i>  | nuclear receptor corepressor 2                                               | 12q24         | 9612   |
| <i>NF1</i>    | neurofibromin 1                                                              | 17q11.2       | 4763   |
| <i>NF2</i>    | neurofibromin 2 (merlin)                                                     | 22q12.2       | 4771   |
| <i>NFE2L2</i> | nuclear factor (erythroid-derived 2)-like 2                                  | 2q31          | 4780   |
| <i>NGF</i>    | nerve growth factor (beta polypeptide)                                       | 1p13.1        | 4803   |
| <i>NOTCH1</i> | notch 1                                                                      | 9q34.3        | 4851   |
| <i>NOTCH2</i> | notch 2                                                                      | 1p13-p11      | 4853   |
| <i>NOTCH3</i> | notch 3                                                                      | 19p13.2-p13.1 | 4854   |
| <i>NOTCH4</i> | notch 4                                                                      | 6p21.3        | 4855   |
| <i>NR1I2</i>  | nuclear receptor subfamily 1, group I, member 2                              | 3q12-q13.3    | 8856   |
| <i>NRAS</i>   | neuroblastoma RAS viral (v-ras) oncogene homolog                             | 1p13.2        | 4893   |
| <i>NSD1</i>   | nuclear receptor binding SET domain protein 1                                | 5q35          | 64324  |
| <i>NTN4</i>   | netrin 4                                                                     | 12q22         | 59277  |
| <i>NTRK1</i>  | neurotrophic tyrosine kinase, receptor, type 1                               | 1q21-q22      | 4914   |
| <i>NTRK2</i>  | neurotrophic tyrosine kinase, receptor, type 2                               | 9q22.1        | 4915   |
| <i>NTRK3</i>  | neurotrophic tyrosine kinase, receptor, type 3                               | 15q25         | 4916   |
| <i>OTUD7A</i> | OTU domain containing 7A                                                     | 15q13.3       | 161725 |
| <i>PALB2</i>  | partner and localizer of BRCA2                                               | 16p12.2       | 79728  |
| <i>PARP1</i>  | poly (ADP-ribose) polymerase 1                                               | 1q41-q42      | 142    |
| <i>PCBP1</i>  | poly(rC) binding protein 1                                                   | 2p13-p12      | 5093   |
| <i>PDCD1</i>  | programmed cell death 1                                                      | 2q37.3        | 5133   |



|                |                                                                                            |            |       |
|----------------|--------------------------------------------------------------------------------------------|------------|-------|
| <i>PDGFRA</i>  | platelet-derived growth factor receptor, alpha polypeptide                                 | 4q12       | 5156  |
| <i>PDGFRB</i>  | platelet-derived growth factor receptor, beta polypeptide                                  | 5q33.1     | 5159  |
| <i>PHOX2B</i>  | paired-like homeobox 2b                                                                    | 4p12       | 8929  |
| <i>PIGF</i>    | phosphatidylinositol glycan anchor biosynthesis, class F                                   | 2p21-p16   | 5281  |
| <i>PIK3CA</i>  | phosphoinositide-3-kinase, catalytic, alpha polypeptide                                    | 3q26.3     | 5290  |
| <i>PIK3CB</i>  | phosphoinositide-3-kinase, catalytic, beta polypeptide                                     | 3q22.3     | 5291  |
| <i>PIK3CD</i>  | phosphoinositide-3-kinase, catalytic, delta polypeptide                                    | 1p36.2     | 5293  |
| <i>PIK3CG</i>  | phosphoinositide-3-kinase, catalytic, gamma polypeptide                                    | 7q22.3     | 5294  |
| <i>PIK3R1</i>  | phosphoinositide-3-kinase, regulatory subunit 1 (alpha)                                    | 5q13.1     | 5295  |
| <i>PLK1</i>    | polo-like kinase 1                                                                         | 16p12.2    | 5347  |
| <i>PMS1</i>    | PMS1 postmeiotic segregation increased 1 ( <i>S. cerevisiae</i> )                          | 2q31.1     | 5378  |
| <i>PMS2</i>    | PMS2 postmeiotic segregation increased 2 ( <i>S. cerevisiae</i> )                          | 7p22.2     | 5395  |
| <i>POLE</i>    | polymerase (DNA directed), epsilon, catalytic subunit                                      | 12q24.3    | 5426  |
| <i>PPM1D</i>   | protein phosphatase, Mg <sup>2+</sup> /Mn <sup>2+</sup> dependent, 1D                      | 17q23.2    | 8493  |
| <i>PPP2R1A</i> | protein phosphatase 2, regulatory subunit A, alpha                                         | 19q13.41   | 5518  |
| <i>PPP2R5C</i> | protein phosphatase 2, regulatory subunit B', gamma                                        | 14q32.31   | 5527  |
| <i>PRF1</i>    | perforin 1 (pore forming protein)                                                          | 10q22      | 5551  |
| <i>PRKARIA</i> | protein kinase, cAMP-dependent, regulatory, type I, alpha (tissue specific extinguisher 1) | 17q23-q24  | 5573  |
| <i>PRKCB</i>   | protein kinase C, beta                                                                     | 16p11.2    | 5579  |
| <i>PRKCE</i>   | protein kinase C, epsilon                                                                  | 2p21       | 5581  |
| <i>PRKCG</i>   | protein kinase C, gamma                                                                    | 19q13.4    | 5582  |
| <i>PRKCH</i>   | protein kinase C, eta                                                                      | 14q23.1    | 5583  |
| <i>PRKCQ</i>   | protein kinase C, theta                                                                    | 10p15      | 5588  |
| <i>PSMB5</i>   | proteasome (prosome, macropain) subunit, beta type, 5                                      | 14q11.2    | 5693  |
| <i>PSMC3IP</i> | PSMC3 interacting protein                                                                  | 17q21.2    | 29893 |
| <i>PTCH1</i>   | patched 1                                                                                  | 9q22.3     | 5727  |
| <i>PTEN</i>    | phosphatase and tensin homolog                                                             | 10q23.3    | 5728  |
| <i>PTK2</i>    | PTK2 protein tyrosine kinase 2                                                             | 8q24.3     | 5747  |
| <i>PTPN11</i>  | protein tyrosine phosphatase, non-receptor type 11                                         | 12q24      | 5781  |
| <i>PTPRD</i>   | protein tyrosine phosphatase, receptor type, D                                             | 9p23-p24.3 | 5789  |
| <i>RAC1</i>    | ras-related C3 botulinum toxin substrate 1 (rho family, small GTP binding protein Rac1)    | 7p22       | 5879  |
| <i>RAD51C</i>  | RAD51 homolog C ( <i>S. cerevisiae</i> )                                                   | 17q25.1    | 5889  |
| <i>RAD51D</i>  | RAD51 paralog D                                                                            | 17q11      | 5892  |
| <i>RAF1</i>    | v-raf-1 murine leukemia viral oncogene homolog 1                                           | 3p25       | 5894  |
| <i>RASA1</i>   | RAS p21 protein activator (GTPase activating protein) 1                                    | 5q13.3     | 5921  |

|                |                                                                                                   |              |        |
|----------------|---------------------------------------------------------------------------------------------------|--------------|--------|
| <i>RBI</i>     | retinoblastoma 1                                                                                  | 13q14.2      | 5925   |
| <i>RBM10</i>   | RNA binding motif protein 10                                                                      | Xp11.23      | 8241   |
| <i>RECQL4</i>  | RecQ protein-like 4                                                                               | 8q24.3       | 9401   |
| <i>RET</i>     | ret proto-oncogene                                                                                | 10q11.2      | 5979   |
| <i>RHBDF2</i>  | rhomboid 5 homolog 2 (Drosophila)                                                                 | 17q25.1      | 79651  |
| <i>RHOA</i>    | ras homolog family member A                                                                       | 3p21.3       | 387    |
| <i>RIT1</i>    | Ras-like without CAAX 1                                                                           | 1q22         | 6016   |
| <i>ROS1</i>    | c-ros oncogene 1 , receptor tyrosine kinase                                                       | 6q22         | 6098   |
| <i>RPS6KC1</i> | ribosomal protein S6 kinase, 52kDa, polypeptide 1                                                 | 1q41         | 26750  |
| <i>RSBNIL</i>  | round spermatid basic protein 1-like                                                              | 7q11.23      | 222194 |
| <i>RUNX1</i>   | runt-related transcription factor 1                                                               | 21q22.3      | 861    |
| <i>RUNX3</i>   | runt-related transcription factor 3                                                               | 1p36         | 864    |
| <i>RXRA</i>    | retinoid X receptor, alpha                                                                        | 9q34.3       | 6256   |
| <i>SACS</i>    | spastic ataxia of Charlevoix-Saguenay (sacsin)                                                    | 13q12        | 26278  |
| <i>SBDS</i>    | Shwachman-Bodian-Diamond syndrome                                                                 | 7q11.21      | 51119  |
| <i>SDHAF2</i>  | succinate dehydrogenase complex assembly factor 2                                                 | 11q12.2      | 54949  |
| <i>SDHB</i>    | succinate dehydrogenase complex, subunit B, iron sulfur (Ip)                                      | 1p36.1-p35   | 6390   |
| <i>SDHC</i>    | succinate dehydrogenase complex, subunit C, integral membrane protein, 15kDa                      | 1q23.3       | 6391   |
| <i>SDHD</i>    | succinate dehydrogenase complex, subunit D, integral membrane protein                             | 11q23        | 6392   |
| <i>SELP</i>    | selectin P (granule membrane protein 140kDa, antigen CD62)                                        | 1q22-q25     | 6403   |
| <i>SF3B1</i>   | splicing factor 3b, subunit 1, 155kDa                                                             | 2q33.1       | 23451  |
| <i>SGK1</i>    | serum/glucocorticoid regulated kinase 1                                                           | 6q23         | 6446   |
| <i>SIRT1</i>   | sirtuin 1                                                                                         | 10q21.3      | 23411  |
| <i>SIRT4</i>   | sirtuin 4                                                                                         | 12q          | 23409  |
| <i>SLAMF7</i>  | SLAM family member 7                                                                              | 1q23.1-q24.1 | 57823  |
| <i>SLC1A3</i>  | solute carrier family 1 (glial high affinity glutamate transporter), member 3                     | 5p13         | 6507   |
| <i>SLC44A3</i> | solute carrier family 44, member 3                                                                | 1p21.3       | 126969 |
| <i>SLC4A5</i>  | solute carrier family 4, sodium bicarbonate cotransporter, member 5                               | 2p13         | 57835  |
| <i>SLX4</i>    | SLX4 structure-specific endonuclease subunit homolog (S. cerevisiae)                              | 16p13.3      | 84464  |
| <i>SMAD2</i>   | SMAD family member 2                                                                              | 18q21.1      | 4087   |
| <i>SMAD4</i>   | SMAD family member 4                                                                              | 18q21.1      | 4089   |
| <i>SMARCA4</i> | SWI/SNF related, matrix associated, actin dependent regulator of chromatin, subfamily a, member 4 | 19p13.2      | 6597   |

|                  |                                                                                                   |                |        |
|------------------|---------------------------------------------------------------------------------------------------|----------------|--------|
| <i>SMARCB1</i>   | SWI/SNF related, matrix associated, actin dependent regulator of chromatin, subfamily b, member 1 | 22q11.23 22q11 | 6598   |
| <i>SMO</i>       | smoothened, frizzled family receptor                                                              | 7q32.3         | 6608   |
| <i>SNX25</i>     | sorting nexin 25                                                                                  | 4q35.1         | 83891  |
| <i>SOS1</i>      | son of sevenless homolog 1 (Drosophila)                                                           | 2p21           | 6654   |
| <i>SOX17</i>     | SRY (sex determining region Y)-box 17                                                             | 8q11.23        | 64321  |
| <i>SPOP</i>      | speckle-type POZ protein                                                                          | 17q21.33       | 8405   |
| <i>SRC</i>       | v-src sarcoma (Schmidt-Ruppin A-2) viral oncogene homolog (avian)                                 | 20q12-q13      | 6714   |
| <i>STAG2</i>     | stromal antigen 2                                                                                 | Xq25           | 10735  |
| <i>STAT5B</i>    | signal transducer and activator of transcription 5B                                               | 17q11.2        | 6777   |
| <i>STK11</i>     | serine/threonine kinase 11                                                                        | 19p13.3        | 6794   |
| <i>STX2</i>      | syntaxin 2                                                                                        | 12q24.33       | 2054   |
| <i>SUFU</i>      | suppressor of fused homolog (Drosophila)                                                          | 10q24.32       | 51684  |
| <i>TAP1</i>      | transporter 1, ATP-binding cassette, sub-family B (MDR/TAP)                                       | 6p21.3         | 6890   |
| <i>TBC1D1</i>    | TBC1 (tre-2/USP6, BUB2, cdc16) domain family, member 1                                            | 4p14           | 23216  |
| <i>TBLIXR1</i>   | transducin (beta)-like 1 X-linked receptor 1                                                      | 3q26.32        | 79718  |
| <i>TBX3</i>      | T-box 3                                                                                           | 12q24.1        | 6926   |
| <i>TCF7L2</i>    | transcription factor 7-like 2 (T-cell specific, HMG-box)                                          | 10q25.3        | 6934   |
| <i>TCP1L2</i>    | t-complex 11 (mouse)-like 2                                                                       | 12q23.3        | 255394 |
| <i>TEK</i>       | TEK tyrosine kinase, endothelial                                                                  | 9p21           | 7010   |
| <i>TGFB2</i>     | transforming growth factor, beta 2                                                                | 1q41           | 7042   |
| <i>TGFB3</i>     | transforming growth factor, beta 3                                                                | 14q24          | 7043   |
| <i>TGFR2</i>     | transforming growth factor, beta receptor II (70/80kDa)                                           | 3p22           | 7048   |
| <i>TMEM127</i>   | transmembrane protein 127                                                                         | 2q11.2         | 55654  |
| <i>TNFRSF10A</i> | tumor necrosis factor receptor superfamily, member 10a                                            | 8p21           | 8797   |
| <i>TNFRSF10B</i> | tumor necrosis factor receptor superfamily, member 10b                                            | 8p22-p21       | 8795   |
| <i>TNFRSF11A</i> | tumor necrosis factor receptor superfamily, member 11a, NFKB activator                            | 18q22.1        | 8792   |
| <i>TNFRSF12A</i> | tumor necrosis factor receptor superfamily, member 12A                                            | 16p13.3        | 51330  |
| <i>TNFRSF8</i>   | tumor necrosis factor receptor superfamily, member 8                                              | 1p36           | 943    |
| <i>TNFRSF9</i>   | tumor necrosis factor receptor superfamily, member 9                                              | 1p36           | 3604   |
| <i>TNFSF13B</i>  | tumor necrosis factor (ligand) superfamily, member 13b                                            | 13q32-q34      | 10673  |
| <i>TP53</i>      | tumor protein p53                                                                                 | 17p13.1        | 7157   |
| <i>TPX2</i>      | TPX2, microtubule-associated, homolog (Xenopus laevis)                                            | 20q11.2        | 22974  |
| <i>TRIM23</i>    | tripartite motif containing 23                                                                    | 5q12.3         | 373    |
| <i>TRPC1</i>     | transient receptor potential cation channel, subfamily C, member 1                                | 3q23           | 7220   |

|               |                                                                 |                 |        |
|---------------|-----------------------------------------------------------------|-----------------|--------|
| <i>TSC1</i>   | tuberous sclerosis 1                                            | 9q34            | 7248   |
| <i>TSC2</i>   | tuberous sclerosis 2                                            | 16p13.3         | 7249   |
| <i>TTL9</i>   | tubulin tyrosine ligase-like family, member 9                   | 20q11.21        | 164395 |
| <i>TXNDC8</i> | thioredoxin domain containing 8 (spermatzoa)                    | 9q31.3          | 255220 |
| <i>U2AF1</i>  | U2 small nuclear RNA auxiliary factor 1                         | 21q22.3         | 7307   |
| <i>USH2A</i>  | Usher syndrome 2A (autosomal recessive, mild)                   | 1q41            | 7399   |
| <i>VEGFA</i>  | vascular endothelial growth factor A                            | 6p12            | 7422   |
| <i>VEGFB</i>  | vascular endothelial growth factor B                            | 11q13           | 7423   |
| <i>VHL</i>    | von Hippel-Lindau tumor suppressor, E3 ubiquitin protein ligase | 3p25.3          | 7428   |
| <i>WRN</i>    | Werner syndrome, RecQ helicase-like                             | 8p12            | 7486   |
| <i>WT1</i>    | Wilms tumor 1                                                   | 11p13           | 7490   |
| <i>XPA</i>    | xeroderma pigmentosum, complementation group A                  | 9q22.3          | 7507   |
| <i>XPC</i>    | xeroderma pigmentosum, complementation group C                  | 3p25            | 7508   |
| <i>YES1</i>   | v-yes-1 Yamaguchi sarcoma viral oncogene homolog 1              | 18p11.31-p11.21 | 7525   |
| <i>ZFH3</i>   | zinc finger homeobox 3                                          | 16q22.3         | 463    |
| <i>ZHX2</i>   | zinc fingers and homeoboxes 2                                   | 8q24.13         | 22882  |
| <i>ZNF471</i> | zinc finger protein 471                                         | 19q13.43        | 57573  |
| <i>ZNF620</i> | zinc finger protein 620                                         | 3p22.1          | 253639 |
| <i>ZNF750</i> | zinc finger protein 750                                         | 17q25.3         | 79755  |
| <i>ZRANB3</i> | zinc finger, RAN-binding domain containing 3                    | 2q21.3          | 84083  |
